# Supplementary material for: Quality of vision after myopic refractive surgeries: SMILE, FS-LASIK, and ICL
Source: PubMed Central journal article supplement (PMC10294434; doi:10.1186/s12886-023-03045-6), 2023-06-26
Supplement: 12886_2023_3045_MOESM1_ESM.pdf [file 12886_2023_3045_MOESM1_ESM.pdf]

| NO. | sex (0=f, 1=m) | age (year) | pupil size (mm) | sphere (D) | cylinder (D) | BCVA (preop) | IOP (mmHg) | CCT (μm) |
|-----|----------------|------------|-----------------|------------|--------------|--------------|------------|----------|
| 1   | 0              | 28         | 6               | -2.5       | -0.5         | 1.0          | 17         | 531      |
| 2   | 1              | 19         | 6.25            | -1.5       | -0.25        | 1.0          | 18         | 539      |
| 3   | 1              | 26         | 5.5             | -2.25      | -0.5         | 1.0          | 16         | 564      |
| 4   | 0              | 34         | 6.5             | -5.5       | -0.5         | 1.0          | 15         | 515      |
| 5   | 0              | 29         | 5.5             | -3.75      | 0            | 1.0          | 12         | 481      |
| 6   | 0              | 23         | 7.25            | -6.5       | -0.75        | 1.0          | 19         | 550      |
| 7   | 1              | 30         | 5.5             | -3.75      | -0.5         | 1.0          | 19         | 511      |
| 8   | 0              | 35         | 5.75            | -4.25      | -0.5         | 1.0          | 16         | 549      |
| 9   | 0              | 25         | 6.75            | -4.75      | -1           | 1.0          | 16         | 477      |
| 10  | 1              | 33         | 6.5             | -5         | -0.25        | 1.0          | 17         | 508      |
| 11  | 0              | 23         | 5.5             | -7.75      | -1           | 1.0          | 20         | 510      |
| 12  | 0              | 27         | 6.25            | -4.75      | -0.5         | 1.0          | 17         | 568      |
| 13  | 0              | 25         | 7               | -7.5       | -1.75        | 1.0          | 19         | 564      |
| 14  | 0              | 25         | 7               | -5.25      | -0.5         | 1.0          | 20         | 554      |
| 15  | 1              | 27         | 4.75            | -2.75      | -0.75        | 1.2          | 14         | 519      |
| 16  | 0              | 30         | 5.5             | -6.5       | -1.25        | 1.0          | 21         | 587      |
| 17  | 0              | 26         | 5.25            | -8.5       | 0            | 1.0          | 19         | 531      |
| 18  | 0              | 24         | 6.5             | -7.75      | -0.25        | 1.0          | 18         | 532      |
| 19  | 0              | 37         | 4.25            | -8         | -0.75        | 1.0          | 16         | 516      |
| 20  | 0              | 33         | 5.5             | -5.25      | -0.5         | 1.0          | 21         | 540      |
| 21  | 1              | 30         | 6.75            | -8.25      | -0.75        | 1.0          | 20         | 509      |
| 22  | 1              | 34         | 4.5             | -4         | 0            | 1.0          | 18         | 552      |
| 23  | 1              | 24         | 7               | -6         | 0            | 1.0          | 19         | 570      |
| 24  | 0              | 26         | 5.5             | -5.5       | -0.5         | 1.0          | 15         | 524      |
| 25  | 0              | 24         | 6.25            | -10.5      | 0            | 0.9          | 17         | 508      |
| 26  | 0              | 20         | 6.75            | -4.25      | -0.5         | 1.0          | 16         | 515      |
| 27  | 1              | 18         | 6.5             | -2.75      | -0.5         | 1.0          | 15         | 534      |
| 28  | 0              | 37         | 5.25            | -2.75      | -1           | 1.0          | 18         | 537      |
| 29  | 0              | 36         | 6               | -4.75      | -1.25        | 1.0          | 18         | 519      |
| 30  | 0              | 32         | 6.75            | -6.25      | -1           | 1.2          | 18         | 510      |
| 31  | 1              | 18         | 7.25            | -6.25      | -1.5         | 1.0          | 19         | 561      |
| 32  | 1              | 22         | 6.5             | -1.5       | 0            | 1.0          | 18         | 540      |
| 33  | 0              | 34         | 6.5             | -5.5       | -0.5         | 1.0          | 17         | 522      |
| 34  | 1              | 19         | 6               | -7.5       | 0            | 1.0          | 16         | 450      |
| 35  | 0              | 25         | 6.75            | -7         | 0            | 1.0          | 13         | 490      |
| 36  | 1              | 20         | 6.75            | -3.5       | 0            | 1.0          | 21         | 569      |
| 37  | 0              | 25         | 6.5             | -13.5      | 0            | 1.0          | 16         | 439      |
| 38  | 0              | 29         | 6.75            | -2         | -0.25        | 1.0          | 15         | 528      |
| 39  | 1              | 19         | 7               | -3         | -2           | 0.9          | 18         | 578      |
| 40  | 0              | 23         | 5               | -4.25      | -0.5         | 1.0          | 19         | 535      |
| 41  | 1              | 20         | 7.25            | -4.5       | -1           | 1.0          | 18         | 555      |
| 42  | 0              | 22         | 7.5             | -6.25      | -0.5         | 1.0          | 16         | 530      |
| 43  | 1              | 23         | 7.25            | -6.25      | -1.25        | 1.0          | 18         | 503      |
| 44  | 1              | 33         | 4               | -3.5       | -1           | 1.2          | 19         | 551      |
| 45  | 0              | 30         | 6               | -2         | -0.25        | 1.0          | 15         | 509      |
| 46  | 0              | 26         | 7               | -8.25      | -2.75        | 1.0          | 18         | 533      |
| 47  | 0              | 28         | 7               | -4         | -0.5         | 1.0          | 16         | 547      |
| 48  | 0              | 25         | 7               | -4.75      | 0            | 1.0          | 15         | 495      |
| 49  | 0              | 21         | 6               | -12        | 0            | 0.9          | 20         | 606      |

|    |   |    |      |       |       |     |    |     |
|----|---|----|------|-------|-------|-----|----|-----|
| 50 | 1 | 32 | 6.75 | -4.5  | -0.25 | 1.0 | 21 | 570 |
| 51 | 0 | 25 | 5.75 | -5.25 | -1    | 1.0 | 18 | 513 |
| 52 | 0 | 24 | 6.75 | -5.5  | -0.5  | 1.0 | 18 | 534 |
| 53 | 1 | 22 | 5    | -5.25 | -1    | 1.2 | 20 | 536 |
| 54 | 0 | 30 | 6.5  | -4    | -0.75 | 1.2 | 16 | 538 |
| 55 | 0 | 27 | 6.75 | -2.75 | -1    | 1.0 | 18 | 529 |
| 56 | 0 | 31 | 6    | -6.25 | -1.25 | 1.0 | 19 | 551 |
| 57 | 0 | 23 | 5.25 | -5    | -1.25 | 1.0 | 18 | 546 |
| 58 | 1 | 25 | 5.75 | -5.5  | -0.5  | 1.2 | 19 | 569 |
| 59 | 0 | 28 | 6    | -2.75 | -0.5  | 1.2 | 16 | 525 |
| 60 | 0 | 27 | 7.25 | -3.75 | 0     | 1.2 | 14 | 509 |
| 61 | 0 | 28 | 7    | -6    | -0.75 | 1.0 | 17 | 549 |
| 62 | 1 | 24 | 6    | -4.5  | -2    | 1.0 | 15 | 537 |
| 63 | 1 | 38 | 5    | -4    | -0.25 | 1.0 | 19 | 555 |
| 64 | 0 | 37 | 6.25 | -5.5  | -0.25 | 1.0 | 14 | 529 |
| 65 | 0 | 28 | 7    | -5.5  | -1    | 1.0 | 18 | 518 |
| 66 | 0 | 23 | 7    | -3.75 | -1    | 1.0 | 19 | 601 |
| 67 | 0 | 26 | 7    | -7.5  | -0.75 | 1.0 | 21 | 596 |
| 68 | 0 | 26 | 5.5  | -3.25 | -0.7  | 1.0 | 15 | 516 |
| 69 | 0 | 26 | 6    | -5.75 | -1    | 1.0 | 20 | 552 |
| 70 | 0 | 27 | 5    | -2.75 | -0.5  | 1.0 | 15 | 538 |
| 71 | 0 | 25 | 6.5  | -3.5  | -0.25 | 1.0 | 17 | 576 |
| 72 | 1 | 25 | 6.75 | -9.75 | -2    | 1.0 | 16 | 514 |
| 73 | 1 | 30 | 6.75 | -3.5  | -0.5  | 1.0 | 18 | 570 |
| 74 | 1 | 22 | 6.75 | -5.5  | -0.5  | 1.0 | 17 | 499 |
| 75 | 1 | 23 | 7.25 | -5.25 | -0.25 | 1.0 | 15 | 510 |
| 76 | 1 | 30 | 5.5  | -2.25 | -0.25 | 1.0 | 18 | 556 |
| 77 | 0 | 20 | 7.25 | -4.5  | -0.75 | 1.0 | 20 | 547 |
| 78 | 1 | 18 | 6.5  | -3.5  | -1    | 1.0 | 21 | 580 |
| 79 | 0 | 30 | 6.75 | -4.75 | -0.25 | 1.0 | 18 | 560 |
| 80 | 1 | 20 | 6.75 | -5.25 | -0.25 | 1.0 | 21 | 556 |
| 81 | 1 | 39 | 5.75 | -6.5  | -0.25 | 1.0 | 20 | 544 |
| 82 | 1 | 18 | 6.5  | -2.75 | -0.75 | 1.0 | 18 | 551 |
| 83 | 0 | 27 | 6.5  | -7.5  | 0     | 0.9 | 17 | 484 |
| 84 | 1 | 21 | 5.75 | -3.25 | 0     | 1.0 | 15 | 519 |
| 85 | 1 | 24 | 5.75 | -6.75 | -0.75 | 1.2 | 19 | 542 |
| 86 | 0 | 26 | 6    | -6    | -0.75 | 1.2 | 15 | 534 |
| 87 | 0 | 23 | 5.7  | -3.25 | -0.25 | 1.0 | 18 | 536 |
| 88 | 1 | 22 | 6.25 | -5.25 | -0.75 | 1.2 | 16 | 540 |
| 89 | 0 | 22 | 5.75 | -6.75 | -0.75 | 1.0 | 16 | 529 |
| 90 | 0 | 23 | 5.75 | -8    | -1.5  | 1.0 | 18 | 506 |
| 91 | 0 | 22 | 6.5  | -3    | -0.5  | 1.0 | 15 | 555 |
| 92 | 1 | 22 | 7    | -4.5  | -0.5  | 1.2 | 17 | 515 |
| 93 | 0 | 24 | 7    | -4.25 | -0.5  | 1.0 | 21 | 513 |
| 94 | 0 | 24 | 7.25 | -3.25 | -1.5  | 1.0 | 15 | 534 |
| 95 | 0 | 32 | 6.5  | -2    | -1    | 1.0 | 17 | 508 |
| 96 | 0 | 30 | 6    | -4.75 | -0.25 | 0.9 | 16 | 569 |
| 97 | 0 | 34 | 6.5  | -5.5  | 0     | 1.0 | 21 | 554 |

|     |   |    |      |       |       |     |    |     |
|-----|---|----|------|-------|-------|-----|----|-----|
| 98  | 0 | 36 | 6    | -3.75 | -0.25 | 1.0 | 17 | 509 |
| 99  | 1 | 23 | 6.75 | -7.5  | -3.5  | 1.0 | 21 | 588 |
| 100 | 0 | 22 | 5.5  | -4    | -1    | 1.0 | 13 | 501 |
| 101 | 0 | 25 | 6.25 | -8    | -1.5  | 1.0 | 18 | 567 |
| 102 | 1 | 25 | 7.25 | -2.75 | -0.25 | 1.0 | 17 | 524 |
| 103 | 1 | 28 | 4.5  | -8.5  | 0     | 1.0 | 15 | 558 |
| 104 | 0 | 29 | 7    | -3.75 | -1    | 1.0 | 16 | 533 |
| 105 | 0 | 31 | 5.5  | -5.75 | -1    | 1.0 | 15 | 489 |
| 106 | 0 | 27 | 5    | -5.5  | -0.25 | 1.2 | 16 | 502 |
| 107 | 0 | 32 | 5    | -4    | -1    | 1.0 | 15 | 527 |
| 108 | 0 | 29 | 3.75 | -5.5  | -0.75 | 1.0 | 15 | 516 |
| 109 | 0 | 27 | 4.5  | -3.5  | -0.25 | 1.0 | 17 | 520 |
| 110 | 0 | 29 | 4.75 | -3.5  | -0.25 | 1.0 | 15 | 545 |
| 111 | 1 | 26 | 6.5  | -5.25 | -0.75 | 1.0 | 16 | 510 |
| 112 | 0 | 23 | 5.25 | -4    | -0.75 | 1.0 | 15 | 522 |
| 113 | 0 | 29 | 6.75 | -3.75 | -0.50 | 1.2 | 20 | 563 |
| 114 | 1 | 22 | 5.5  | -3.25 | -0.75 | 1.0 | 16 | 551 |
| 115 | 0 | 25 | 5.75 | -7.25 | -0.5  | 1.0 | 17 | 543 |
| 116 | 0 | 23 | 6    | -2.25 | -0.25 | 1.2 | 15 | 545 |
| 117 | 0 | 29 | 6.5  | -5.5  | -0.5  | 1.2 | 13 | 523 |
| 118 | 1 | 33 | 6.25 | -2.25 | -0.25 | 1.2 | 21 | 605 |
| 119 | 0 | 25 | 5.75 | -3.75 | -1.25 | 1.0 | 19 | 562 |
| 120 | 0 | 28 | 7    | -3.75 | -0.75 | 1.2 | 16 | 503 |
| 121 | 0 | 26 | 6.75 | -3.75 | -0.25 | 1.0 | 15 | 538 |
| 122 | 0 | 26 | 7.75 | -5.5  | -0.25 | 1.0 | 16 | 517 |
| 123 | 0 | 25 | 5.25 | -5.25 | -1    | 0.9 | 19 | 569 |
| 124 | 0 | 25 | 6.5  | -4.75 | -0.5  | 1.0 | 17 | 517 |
| 125 | 0 | 26 | 6.5  | -3.25 | -0.25 | 1.0 | 17 | 518 |
| 126 | 0 | 26 | 5    | -5    | -0.75 | 1.0 | 15 | 515 |
| 127 | 0 | 26 | 7.75 | -5.25 | -0.5  | 1.0 | 16 | 514 |
| 128 | 0 | 24 | 7    | -4.5  | 0     | 1.0 | 20 | 598 |
| 129 | 0 | 30 | 7.5  | -3.75 | 0     | 1.2 | 20 | 573 |
| 130 | 0 | 28 | 6.75 | -1.75 | -0.5  | 1.0 | 18 | 569 |
| 131 | 0 | 23 | 6.25 | -4.5  | -0.25 | 0.9 | 17 | 528 |

| K1 (D) | K2 (D) | Km (D) | x (mm) | y (mm) | Chord $\mu$ (mm) | procedure (1=SMILE, 2=FS-LASIK, 3=ICL) | post-op UDVA | post-op CDVA |
|--------|--------|--------|--------|--------|------------------|----------------------------------------|--------------|--------------|
| 43.5   | 44.7   | 44.1   | 0.16   | -0.02  | 0.161245155      |                                        | 1            | 1.2          |
| 42     | 43     | 42.5   | -0.01  | -0.03  | 0.031622777      |                                        | 2            | 1.0          |
| 40.2   | 41.1   | 40.65  | 0.25   | 0.06   | 0.257099203      |                                        | 1            | 1.5          |
| 42.9   | 43.4   | 43.15  | 0.27   | 0.09   | 0.284604989      |                                        | 2            | 1.2          |
| 44.7   | 45.4   | 45.05  | -0.28  | -0.08  | 0.291204396      |                                        | 3            | 1.2          |
| 43.2   | 44.1   | 43.65  | -0.08  | 0.09   | 0.120415946      |                                        | 2            | 1.0          |
| 42.7   | 43.8   | 43.25  | -0.09  | 0.06   | 0.108166538      |                                        | 1            | 1.0          |
| 42.4   | 42.8   | 42.6   | -0.15  | 0.02   | 0.15132746       |                                        | 2            | 1.2          |
| 43.5   | 45.5   | 44.5   | -0.23  | 0.38   | 0.444184646      |                                        | 3            | 1.0          |
| 43.7   | 44.2   | 43.95  | 0.01   | -0.11  | 0.11045361       |                                        | 2            | 1.5          |
| 45.6   | 46.3   | 45.95  | -0.11  | -0.16  | 0.194164878      |                                        | 3            | 1.0          |
| 45.6   | 46.4   | 46     | -0.15  | -0.08  | 0.17             |                                        | 2            | 1.5          |
| 43.4   | 45.8   | 44.6   | 0.02   | 0.11   | 0.111803399      |                                        | 3            | 1.2          |
| 40.3   | 41.7   | 41     | -0.15  | 0.29   | 0.326496554      |                                        | 2            | 1.2          |
| 42.0   | 43.4   | 42.7   | 0.24   | -0.10  | 0.26             |                                        | 3            | 1.2          |
| 42.1   | 43.4   | 42.75  | 0.08   | 0.13   | 0.152643375      |                                        | 3            | 1.5          |
| 43.3   | 44.5   | 43.9   | -0.15  | -0.09  | 0.174928557      |                                        | 3            | 1.2          |
| 45.1   | 45.9   | 45.5   | -0.12  | -0.10  | 0.156204994      |                                        | 2            | 1.2          |
| 45.3   | 47.2   | 46.25  | -0.08  | 0.12   | 0.144222051      |                                        | 2            | 1.2          |
| 43.3   | 44.3   | 43.8   | 0.18   | -0.17  | 0.247588368      |                                        | 2            | 1.2          |
| 42.7   | 43.7   | 43.2   | -0.01  | 0.16   | 0.160312195      |                                        | 3            | 1.0          |
| 43.9   | 44.4   | 44.15  | 0      | 0.04   | 0.04             |                                        | 2            | 1.2          |
| 41.7   | 42.2   | 41.95  | 0.2    | 0.11   | 0.228254244      |                                        | 2            | 1.0          |
| 43.4   | 43.8   | 43.6   | -0.01  | 0.06   | 0.060827625      |                                        | 1            | 1.2          |
| 43.3   | 44.7   | 44     | 0.01   | 0.22   | 0.220227155      |                                        | 3            | 1.2          |
| 44.1   | 45.2   | 44.65  | -0.02  | 0.04   | 0.04472136       |                                        | 2            | 1.2          |
| 42.1   | 43.1   | 42.6   | 0.04   | 0.08   | 0.089442719      |                                        | 1            | 1.5          |
| 40.7   | 41.3   | 41     | 0.03   | 0      | 0.03             |                                        | 1            | 1.2          |
| 43.4   | 45.1   | 44.25  | -0.02  | 0.1    | 0.10198039       |                                        | 2            | 1.0          |
| 43.3   | 44.8   | 44.05  | 0.09   | 0.1    | 0.13453624       |                                        | 2            | 1.2          |
| 40.5   | 42.2   | 41.35  | 0.37   | -0.22  | 0.430464865      |                                        | 1            | 1.5          |
| 42.3   | 43.0   | 42.65  | -0.03  | -0.09  | 0.09486833       |                                        | 1            | 1.5          |
| 44.1   | 46.2   | 45.15  | -0.03  | 0.05   | 0.058309519      |                                        | 2            | 1.2          |
| 44.3   | 45.9   | 45.1   | -0.32  | -0.04  | 0.32249031       |                                        | 3            | 1.2          |
| 44.3   | 45.3   | 44.8   | -0.33  | 0.04   | 0.332415403      |                                        | 3            | 1.2          |
| 41.8   | 42.8   | 42.3   | -0.07  | 0.29   | 0.298328678      |                                        | 2            | 1.0          |
| 43     | 44.2   | 43.6   | 0.4    | 0.32   | 0.512249939      |                                        | 3            | 1.2          |
| 42.7   | 43.7   | 43.2   | 0.05   | 0.06   | 0.078102497      |                                        | 2            | 1.2          |
| 39.8   | 42.1   | 40.95  | 0.02   | 0.2    | 0.200997512      |                                        | 2            | 1.2          |
| 44     | 45.2   | 44.6   | 0      | 0.28   | 0.28             |                                        | 1            | 1.2          |
| 42.8   | 44.3   | 43.55  | -0.17  | 0.15   | 0.226715681      |                                        | 1            | 1.0          |
| 42.4   | 43.3   | 42.85  | -0.12  | 0.11   | 0.162788206      |                                        | 2            | 1.2          |
| 43.1   | 44.6   | 43.85  | 0.34   | -0.02  | 0.340587727      |                                        | 3            | 1.2          |
| 43     | 44.5   | 43.75  | -0.07  | 0.01   | 0.070710678      |                                        | 1            | 1.0          |
| 41.2   | 42.4   | 41.8   | -0.12  | 0.06   | 0.134164079      |                                        | 1            | 1.0          |
| 42.7   | 45.4   | 44.05  | -0.16  | 0.1    | 0.188679623      |                                        | 3            | 1.2          |
| 41.9   | 42.6   | 42.25  | -0.06  | 0.18   | 0.18973666       |                                        | 2            | 1.0          |
| 42.3   | 42.8   | 42.55  | 0.1    | -0.01  | 0.100498756      |                                        | 2            | 1.0          |
| 45.5   | 46.9   | 46.2   | 0.13   | 0      | 0.13             |                                        | 3            | 1.0          |

|      |      |       |       |       |             |   |     |     |
|------|------|-------|-------|-------|-------------|---|-----|-----|
| 42.8 | 43.7 | 43.25 | 0.26  | -0.07 | 0.26925824  | 1 | 1.5 | 1.5 |
| 43.4 | 44.2 | 43.8  | 0.04  | 0.01  | 0.041231056 | 2 | 1.0 | 1.2 |
| 45.3 | 46.4 | 45.85 | 0.06  | 0.12  | 0.134164079 | 1 | 1.5 | 1.5 |
| 43   | 44.5 | 43.75 | -0.02 | -0.04 | 0.04472136  | 1 | 1.5 | 1.5 |
| 44   | 45.2 | 44.6  | -0.01 | 0.1   | 0.100498756 | 1 | 1.2 | 1.2 |
| 43.8 | 45.4 | 44.6  | -0.03 | 0     | 0.03        | 2 | 1.2 | 1.5 |
| 42.2 | 43.4 | 42.8  | 0.09  | 0.06  | 0.108166538 | 2 | 1.5 | 1.5 |
| 40.4 | 42.1 | 41.25 | 0.12  | 0.21  | 0.241867732 | 2 | 1.5 | 1.5 |
| 39.7 | 40.8 | 40.25 | 0.18  | -0.02 | 0.181107703 | 1 | 1.0 | 1.2 |
| 43.3 | 44.1 | 43.7  | 0.12  | 0     | 0.12        | 2 | 1.5 | 1.5 |
| 42.2 | 42.6 | 42.4  | 0.05  | -0.01 | 0.050990195 | 1 | 1.2 | 1.2 |
| 42.6 | 44.6 | 43.6  | 0.02  | -0.23 | 0.230867928 | 2 | 1.2 | 1.5 |
| 40.8 | 42.6 | 41.7  | -0.13 | 0.22  | 0.255538647 | 2 | 1.0 | 1.5 |
| 42.6 | 42.8 | 42.7  | 0.04  | -0.01 | 0.041231056 | 2 | 1.5 | 1.5 |
| 41.8 | 42.0 | 41.9  | -0.24 | -0.17 | 0.294108823 | 2 | 1.2 | 1.2 |
| 41.2 | 42.4 | 41.8  | 0.07  | 0.07  | 0.098994949 | 2 | 1.2 | 1.2 |
| 41.6 | 42.8 | 42.2  | 0.14  | 0.16  | 0.212602916 | 1 | 1.2 | 1.2 |
| 44   | 45.2 | 44.6  | 0.27  | 0.36  | 0.45        | 2 | 1.0 | 1.2 |
| 40.5 | 41.7 | 41.1  | 0.01  | 0.11  | 0.11045361  | 2 | 1.5 | 1.5 |
| 42.3 | 43.6 | 42.95 | -0.06 | -0.05 | 0.078102497 | 1 | 1.2 | 1.2 |
| 41.4 | 42.1 | 41.75 | 0     | 0.21  | 0.21        | 2 | 1.0 | 1.2 |
| 42.4 | 43.4 | 42.9  | 0.12  | 0.09  | 0.15        | 1 | 1.2 | 1.2 |
| 41.8 | 43.9 | 42.85 | 0.17  | -0.05 | 0.177200451 | 3 | 0.9 | 1.0 |
| 42.2 | 42.9 | 42.55 | 0.02  | 0.17  | 0.171172428 | 2 | 1.2 | 1.5 |
| 45.3 | 45.9 | 45.6  | -0.28 | 0.12  | 0.304630924 | 2 | 1.2 | 1.2 |
| 42.1 | 42.4 | 42.25 | 0.08  | 0     | 0.08        | 2 | 1.2 | 1.2 |
| 43   | 43.1 | 43.05 | -0.01 | 0.02  | 0.02236068  | 2 | 1.2 | 1.5 |
| 43.7 | 45.3 | 44.5  | 0.4   | 0.12  | 0.41761226  | 2 | 1.2 | 1.2 |
| 42.3 | 43.2 | 42.75 | 0.14  | -0.07 | 0.156524758 | 1 | 1.2 | 1.2 |
| 43.6 | 44.5 | 44.05 | 0.04  | -0.04 | 0.056568542 | 1 | 0.9 | 0.9 |
| 42.2 | 43.2 | 42.7  | -0.26 | -0.14 | 0.295296461 | 2 | 1.0 | 1.2 |
| 41.8 | 43.2 | 42.5  | 0.11  | 0.12  | 0.162788206 | 2 | 1.2 | 1.2 |
| 43.1 | 44.1 | 43.6  | 0.15  | -0.19 | 0.242074369 | 1 | 1.0 | 1.0 |
| 41.9 | 43   | 42.45 | -0.14 | -0.18 | 0.228035085 | 3 | 1.2 | 1.5 |
| 42.3 | 42.6 | 42.45 | -0.23 | 0.06  | 0.237697286 | 1 | 1.2 | 1.2 |
| 41.4 | 42.7 | 42.05 | 0.19  | 0.26  | 0.322024844 | 2 | 1.2 | 1.2 |
| 42.3 | 43.2 | 42.75 | -0.2  | -0.08 | 0.215406592 | 2 | 1.2 | 1.2 |
| 41.6 | 42.4 | 42    | -0.09 | 0.19  | 0.21023796  | 2 | 1.2 | 1.2 |
| 40.8 | 42   | 41.4  | -0.2  | 0.19  | 0.275862284 | 2 | 1.5 | 1.5 |
| 41.9 | 43   | 42.45 | -0.02 | 0.13  | 0.131529464 | 2 | 1.0 | 1.0 |
| 41.8 | 43.4 | 42.6  | 0.28  | 0.05  | 0.284429253 | 3 | 1.0 | 1.0 |
| 43.4 | 44.5 | 43.95 | 0.02  | 0.32  | 0.320624391 | 1 | 1.0 | 1.2 |
| 42.3 | 43.1 | 42.7  | 0.01  | 0.04  | 0.041231056 | 2 | 1.2 | 1.2 |
| 46.2 | 47.7 | 46.95 | 0     | 0.13  | 0.13        | 2 | 1.2 | 1.2 |
| 42.2 | 44.5 | 43.35 | -0.09 | 0.14  | 0.16643317  | 2 | 0.9 | 1.0 |
| 43.1 | 45.1 | 44.1  | -0.02 | 0.04  | 0.04472136  | 2 | 1.2 | 1.5 |
| 43.5 | 44.3 | 43.9  | -0.05 | 0.23  | 0.235372046 | 1 | 1.0 | 1.0 |
| 43.3 | 44.4 | 43.85 | -0.1  | 0.23  | 0.250798724 | 1 | 1.2 | 1.2 |

|      |      |       |       |       |             |   |     |     |
|------|------|-------|-------|-------|-------------|---|-----|-----|
| 43.2 | 44.1 | 43.65 | 0.05  | 0.04  | 0.064031242 | 2 | 0.9 | 1.2 |
| 40.2 | 43.5 | 41.85 | -0.46 | 0.18  | 0.493963561 | 2 | 1.2 | 1.2 |
| 43.9 | 45.5 | 44.7  | -0.09 | 0     | 0.09        | 3 | 1.2 | 1.2 |
| 44.3 | 46   | 45.15 | -0.18 | 0.04  | 0.184390889 | 3 | 1.2 | 1.2 |
| 43.7 | 44.6 | 44.15 | -0.04 | -0.04 | 0.056568542 | 2 | 1.2 | 1.2 |
| 43.1 | 44.1 | 43.6  | 0.18  | 0.11  | 0.210950231 | 3 | 1.2 | 1.2 |
| 44   | 45.9 | 44.95 | -0.05 | 0.13  | 0.139283883 | 1 | 1.0 | 1.0 |
| 45   | 46   | 45.5  | 0.07  | 0.03  | 0.076157731 | 3 | 1.2 | 1.2 |
| 43.6 | 44.7 | 44.15 | 0.06  | 0.09  | 0.108166538 | 2 | 1.0 | 1.0 |
| 44.8 | 47   | 45.9  | 0.28  | 0.11  | 0.300832179 | 2 | 1.2 | 1.2 |
| 44.1 | 45.4 | 44.75 | 0.04  | 0.09  | 0.098488578 | 2 | 1.2 | 1.5 |
| 43.9 | 45.5 | 44.7  | -0.02 | 0.19  | 0.191049732 | 2 | 1.2 | 1.2 |
| 43.1 | 44.1 | 43.6  | -0.22 | 0.1   | 0.241660919 | 1 | 1.0 | 1.0 |
| 43.9 | 45.1 | 44.5  | 0.01  | 0     | 0.01        | 2 | 1.0 | 1.0 |
| 43.2 | 44.1 | 43.65 | -0.45 | 0.14  | 0.471274867 | 2 | 1.5 | 1.5 |
| 43.6 | 44.2 | 43.9  | -0.04 | 0.25  | 0.253179778 | 2 | 1.2 | 1.2 |
| 42.8 | 44.5 | 43.65 | -0.11 | 0.12  | 0.162788206 | 1 | 1.2 | 1.2 |
| 41.7 | 42.6 | 42.15 | -0.11 | 0.08  | 0.136014705 | 3 | 1.5 | 1.5 |
| 42.6 | 43.9 | 43.25 | 0.02  | -0.21 | 0.210950231 | 1 | 1.5 | 1.5 |
| 43.3 | 44.5 | 43.9  | 0     | -0.04 | 0.04        | 2 | 1.5 | 1.5 |
| 41.8 | 42.6 | 42.2  | 0.02  | -0.01 | 0.02236068  | 1 | 1.2 | 1.2 |
| 42.5 | 44.4 | 43.45 | -0.03 | 0.17  | 0.172626765 | 2 | 1.2 | 1.2 |
| 43.4 | 44.1 | 43.75 | 0.04  | 0.14  | 0.145602198 | 2 | 1.0 | 1.2 |
| 43.7 | 44.6 | 44.15 | -0.16 | 0.09  | 0.183575598 | 1 | 1.5 | 1.5 |
| 40.7 | 41.2 | 40.95 | -0.11 | 0.05  | 0.12083046  | 2 | 1.0 | 1.0 |
| 45.4 | 45.7 | 45.55 | -0.06 | 0.04  | 0.072111026 | 2 | 1.0 | 1.0 |
| 44.6 | 45.3 | 44.95 | -0.43 | -0.03 | 0.431045241 | 2 | 1.2 | 1.2 |
| 43.7 | 44.3 | 44    | -0.13 | -0.01 | 0.130384048 | 2 | 1.0 | 1.0 |
| 43.5 | 44.4 | 43.95 | -0.01 | 0.16  | 0.160312195 | 2 | 1.2 | 1.2 |
| 42.2 | 42.8 | 42.5  | 0.12  | -0.11 | 0.162788206 | 2 | 1.5 | 1.5 |
| 41.8 | 43.3 | 42.55 | -0.09 | -0.09 | 0.127279221 | 2 | 1.0 | 1.0 |
| 43   | 44.1 | 43.55 | 0.11  | 0.25  | 0.273130006 | 2 | 1.2 | 1.2 |
| 42.4 | 42.8 | 42.6  | -0.08 | 0.17  | 0.187882942 | 2 | 1.2 | 1.2 |
| 43   | 43.9 | 43.45 | -0.28 | 0.16  | 0.32249031  | 1 | 1.2 | 1.2 |

| post-op<br>sphere<br>(D) | post-op<br>cylinder<br>(D) | glare | galre-<br>frequen-<br>cy | glare-<br>severi-<br>ty | glareb<br>orther<br>some | halos | halos-<br>frequen-<br>cy | halos-<br>severity | halos-<br>borthers<br>ome |
|--------------------------|----------------------------|-------|--------------------------|-------------------------|--------------------------|-------|--------------------------|--------------------|---------------------------|
| -0.25                    | 0                          | 2     | 1                        | 1                       | 0                        | 0     | 0                        | 0                  | 0                         |
| -0.25                    | 0                          | 0     | 0                        | 0                       | 0                        | 0     | 0                        | 0                  | 0                         |
| 0                        | 0                          | 2     | 1                        | 0                       | 1                        | 0     | 0                        | 0                  | 0                         |
| 0                        | 0                          | 1     | 1                        | 0                       | 0                        | 1     | 1                        | 0                  | 0                         |
| 0                        | 0                          | 0     | 0                        | 0                       | 0                        | 3     | 1                        | 1                  | 1                         |
| 0                        | -0.25                      | 2     | 1                        | 1                       | 0                        | 2     | 1                        | 1                  | 0                         |
| 0                        | -0.5                       | 0     | 0                        | 0                       | 0                        | 0     | 0                        | 0                  | 0                         |
| -0.25                    | 0                          | 4     | 2                        | 1                       | 1                        | 3     | 1                        | 1                  | 1                         |
| -0.25                    | -0.75                      | 3     | 1                        | 1                       | 1                        | 4     | 2                        | 1                  | 1                         |
| 0.5                      | -0.25                      | 0     | 0                        | 0                       | 0                        | 0     | 0                        | 0                  | 0                         |
| 0                        | 0                          | 0     | 0                        | 0                       | 0                        | 3     | 3                        | 0                  | 0                         |
| 0.5                      | 0                          | 2     | 1                        | 1                       | 0                        | 0     | 0                        | 0                  | 0                         |
| 0                        | -0.5                       | 3     | 1                        | 1                       | 1                        | 6     | 3                        | 2                  | 1                         |
| 0                        | 0                          | 3     | 1                        | 1                       | 1                        | 3     | 1                        | 1                  | 1                         |
| 0                        | 0                          | 2     | 1                        | 1                       | 0                        | 5     | 2                        | 2                  | 1                         |
| 0                        | 0                          | 0     | 0                        | 0                       | 0                        | 2     | 1                        | 1                  | 0                         |
| 0                        | 0                          | 0     | 0                        | 0                       | 0                        | 0     | 0                        | 0                  | 0                         |
| -0.25                    | 0                          | 2     | 1                        | 1                       | 0                        | 3     | 1                        | 1                  | 1                         |
| 0.25                     | 0                          | 1     | 1                        | 0                       | 0                        | 0     | 0                        | 0                  | 0                         |
| 0                        | 0                          | 2     | 1                        | 1                       | 0                        | 0     | 0                        | 0                  | 0                         |
| -0.25                    | 0                          | 0     | 0                        | 0                       | 0                        | 5     | 2                        | 2                  | 1                         |
| 0                        | 0                          | 3     | 1                        | 1                       | 1                        | 0     | 0                        | 0                  | 0                         |
| 0                        | 0                          | 3     | 1                        | 1                       | 1                        | 5     | 2                        | 2                  | 1                         |
| 0                        | 0                          | 5     | 1                        | 2                       | 2                        | 4     | 1                        | 1                  | 2                         |
| 0                        | 0                          | 5     | 3                        | 1                       | 1                        | 4     | 3                        | 1                  | 0                         |
| -0.25                    | 0                          | 0     | 0                        | 0                       | 0                        | 0     | 0                        | 0                  | 0                         |
| 0                        | 0                          | 2     | 1                        | 1                       | 0                        | 0     | 0                        | 0                  | 0                         |
| -0.25                    | 0                          | 3     | 1                        | 1                       | 1                        | 3     | 1                        | 1                  | 1                         |
| -0.25                    | -0.5                       | 3     | 1                        | 1                       | 1                        | 0     | 0                        | 0                  | 0                         |
| -0.25                    | 0                          | 3     | 1                        | 1                       | 1                        | 4     | 2                        | 1                  | 1                         |
| -0.25                    | -0.5                       | 5     | 1                        | 3                       | 1                        | 3     | 1                        | 1                  | 1                         |
| 0                        | 0                          | 3     | 1                        | 1                       | 1                        | 3     | 1                        | 1                  | 1                         |
| -0.25                    | 0                          | 4     | 1                        | 2                       | 1                        | 3     | 1                        | 1                  | 1                         |
| 0.25                     | -1                         | 4     | 3                        | 1                       | 0                        | 0     | 0                        | 0                  | 0                         |
| 0                        | 0                          | 4     | 1                        | 2                       | 1                        | 3     | 1                        | 1                  | 1                         |
| -0.25                    | -0.5                       | 3     | 1                        | 1                       | 1                        | 2     | 1                        | 1                  | 0                         |
| 0                        | 0                          | 3     | 1                        | 1                       | 1                        | 2     | 1                        | 1                  | 0                         |
| 0.25                     | 0                          | 3     | 1                        | 1                       | 1                        | 3     | 1                        | 1                  | 1                         |
| 0                        | -0.5                       | 3     | 1                        | 1                       | 1                        | 0     | 0                        | 0                  | 0                         |
| 0                        | 0                          | 2     | 1                        | 1                       | 0                        | 0     | 0                        | 0                  | 0                         |
| -0.25                    | 0                          | 3     | 1                        | 1                       | 1                        | 0     | 0                        | 0                  | 0                         |
| -0.25                    | 0                          | 0     | 0                        | 0                       | 0                        | 1     | 1                        | 0                  | 0                         |
| -0.5                     | -0.5                       | 2     | 1                        | 1                       | 0                        | 2     | 1                        | 1                  | 0                         |
| 0.25                     | -0.75                      | 2     | 1                        | 1                       | 0                        | 3     | 1                        | 1                  | 1                         |
| 0.5                      | -0.25                      | 0     | 0                        | 0                       | 0                        | 0     | 0                        | 0                  | 0                         |
| 0                        | 0                          | 6     | 3                        | 2                       | 1                        | 6     | 3                        | 2                  | 1                         |
| 0                        | 0                          | 3     | 1                        | 1                       | 1                        | 3     | 1                        | 1                  | 1                         |
| -0.5                     | 0                          | 1     | 1                        | 0                       | 0                        | 0     | 0                        | 0                  | 0                         |
| 0                        | 0                          | 4     | 2                        | 1                       | 1                        | 5     | 3                        | 1                  | 1                         |

|       |       |   |   |   |   |   |   |   |   |
|-------|-------|---|---|---|---|---|---|---|---|
| 0     | 0     | 0 | 0 | 0 | 0 | 0 | 0 | 0 | 0 |
| 0.25  | -0.25 | 0 | 0 | 0 | 0 | 1 | 1 | 0 | 0 |
| 0     | 0     | 3 | 1 | 1 | 1 | 3 | 1 | 1 | 1 |
| -0.25 | 0     | 0 | 0 | 0 | 0 | 0 | 0 | 0 | 0 |
| 0.5   | 0     | 3 | 1 | 1 | 1 | 0 | 0 | 0 | 0 |
| 0.5   | -0.5  | 3 | 1 | 1 | 1 | 3 | 1 | 1 | 1 |
| 0     | 0     | 0 | 0 | 0 | 0 | 1 | 1 | 0 | 0 |
| 0.25  | 0     | 2 | 1 | 1 | 0 | 0 | 0 | 0 | 0 |
| -0.25 | 0     | 3 | 1 | 1 | 1 | 0 | 0 | 0 | 0 |
| 0     | 0     | 3 | 1 | 1 | 1 | 0 | 0 | 0 | 0 |
| 0.25  | 0     | 4 | 1 | 2 | 1 | 0 | 0 | 0 | 0 |
| 0.5   | -0.25 | 3 | 1 | 1 | 1 | 0 | 0 | 0 | 0 |
| 1     | -0.75 | 4 | 2 | 1 | 1 | 5 | 2 | 2 | 1 |
| 0     | 0     | 0 | 0 | 0 | 0 | 0 | 0 | 0 | 0 |
| 0     | -0.5  | 6 | 3 | 2 | 1 | 4 | 2 | 1 | 1 |
| 0     | 0     | 2 | 1 | 1 | 0 | 2 | 1 | 1 | 0 |
| 0     | 0     | 2 | 1 | 1 | 0 | 0 | 0 | 0 | 0 |
| -0.75 | -0.5  | 2 | 1 | 1 | 0 | 0 | 0 | 0 | 0 |
| 0     | 0     | 5 | 3 | 1 | 1 | 3 | 1 | 1 | 1 |
| 0.25  | -0.25 | 3 | 1 | 1 | 1 | 0 | 0 | 0 | 0 |
| -0.25 | 0     | 3 | 1 | 1 | 1 | 3 | 1 | 1 | 1 |
| 0     | 0     | 0 | 0 | 0 | 0 | 2 | 1 | 1 | 0 |
| -0.5  | 0     | 6 | 3 | 2 | 1 | 6 | 3 | 2 | 1 |
| 0     | -0.5  | 3 | 1 | 1 | 1 | 0 | 0 | 0 | 0 |
| 0     | 0     | 3 | 1 | 1 | 1 | 0 | 0 | 0 | 0 |
| 0     | 0     | 3 | 1 | 1 | 1 | 2 | 1 | 1 | 0 |
| -0.5  | 0     | 3 | 1 | 1 | 1 | 6 | 3 | 2 | 1 |
| 0     | 0     | 0 | 0 | 0 | 0 | 3 | 2 | 1 | 0 |
| 0.25  | -0.25 | 3 | 1 | 1 | 1 | 0 | 0 | 0 | 0 |
| 0     | 0     | 3 | 1 | 1 | 1 | 4 | 2 | 1 | 1 |
| -0.25 | -0.25 | 3 | 1 | 1 | 1 | 0 | 0 | 0 | 0 |
| 0.25  | -0.5  | 6 | 3 | 2 | 1 | 0 | 0 | 0 | 0 |
| 0     | 0     | 2 | 1 | 1 | 0 | 0 | 0 | 0 | 0 |
| 0     | -0.5  | 0 | 0 | 0 | 0 | 3 | 1 | 1 | 1 |
| 0     | 0     | 0 | 0 | 0 | 0 | 2 | 1 | 1 | 0 |
| 0     | 0     | 0 | 0 | 0 | 0 | 3 | 1 | 1 | 1 |
| 0.25  | 0     | 3 | 1 | 1 | 1 | 0 | 0 | 0 | 0 |
| 0     | 0     | 1 | 1 | 0 | 0 | 1 | 1 | 0 | 0 |
| 0     | 0     | 2 | 1 | 1 | 0 | 2 | 1 | 1 | 0 |
| -0.25 | 0     | 5 | 2 | 2 | 1 | 4 | 1 | 2 | 1 |
| 0     | 0     | 4 | 2 | 1 | 1 | 5 | 2 | 2 | 1 |
| 0.5   | 0     | 3 | 1 | 1 | 1 | 3 | 1 | 1 | 1 |
| 0     | 0     | 7 | 3 | 2 | 2 | 0 | 0 | 0 | 0 |
| 0     | 0     | 3 | 1 | 1 | 1 | 2 | 1 | 1 | 0 |
| 0     | -0.5  | 3 | 1 | 1 | 1 | 3 | 1 | 1 | 1 |
| 0     | 0     | 3 | 1 | 1 | 1 | 3 | 1 | 1 | 1 |
| 0     | 0     | 5 | 2 | 2 | 1 | 5 | 3 | 1 | 1 |
| 0     | 0     | 3 | 1 | 1 | 1 | 3 | 1 | 1 | 1 |



|       |       |   |   |   |   |   |   |   |   |
|-------|-------|---|---|---|---|---|---|---|---|
| -0.5  | 0     | 3 | 1 | 1 | 1 | 3 | 1 | 1 | 1 |
| 0     | 0     | 4 | 2 | 1 | 1 | 4 | 2 | 1 | 1 |
| 0     | 0     | 6 | 3 | 2 | 1 | 4 | 2 | 1 | 1 |
| 0     | 0     | 3 | 1 | 1 | 1 | 4 | 2 | 1 | 1 |
| 0     | 0     | 3 | 1 | 1 | 1 | 0 | 0 | 0 | 0 |
| 0     | 0     | 3 | 1 | 1 | 1 | 2 | 1 | 1 | 0 |
| 0     | 0     | 3 | 1 | 1 | 1 | 2 | 1 | 1 | 0 |
| 0     | 0     | 3 | 1 | 1 | 1 | 0 | 0 | 0 | 0 |
| 0.25  | 0     | 0 | 0 | 0 | 0 | 1 | 1 | 0 | 0 |
| -0.25 | 0     | 0 | 0 | 0 | 0 | 2 | 1 | 1 | 0 |
| 0.25  | 0     | 3 | 1 | 1 | 1 | 0 | 0 | 0 | 0 |
| 0     | -0.25 | 3 | 1 | 1 | 1 | 2 | 1 | 1 | 0 |
| 0     | 0     | 0 | 0 | 0 | 0 | 0 | 0 | 0 | 0 |
| 0     | 0     | 0 | 0 | 0 | 0 | 2 | 1 | 1 | 0 |
| 0     | 0     | 1 | 1 | 0 | 0 | 4 | 2 | 1 | 1 |
| 0     | 0     | 2 | 1 | 1 | 0 | 0 | 0 | 0 | 0 |
| 0     | 0     | 0 | 0 | 0 | 0 | 0 | 0 | 0 | 0 |
| 0     | 0     | 5 | 2 | 2 | 1 | 5 | 2 | 2 | 1 |
| 0     | 0     | 3 | 1 | 1 | 1 | 0 | 0 | 0 | 0 |
| 0     | 0     | 0 | 0 | 0 | 0 | 0 | 0 | 0 | 0 |
| 0     | 0     | 5 | 2 | 2 | 1 | 6 | 3 | 2 | 1 |
| 0     | 0     | 0 | 0 | 0 | 0 | 2 | 1 | 1 | 0 |
| 0     | -0.5  | 5 | 2 | 1 | 2 | 0 | 0 | 0 | 0 |
| 0     | 0     | 0 | 0 | 0 | 0 | 0 | 0 | 0 | 0 |
| 0     | 0     | 8 | 3 | 3 | 2 | 3 | 1 | 1 | 1 |
| 0     | 0     | 0 | 0 | 0 | 0 | 0 | 0 | 0 | 0 |
| 0     | 0     | 3 | 1 | 1 | 1 | 3 | 1 | 1 | 1 |
| 0     | 0     | 8 | 3 | 3 | 2 | 3 | 1 | 1 | 1 |
| 0     | 0     | 0 | 0 | 0 | 0 | 0 | 0 | 0 | 0 |
| 0     | 0     | 1 | 1 | 0 | 0 | 1 | 1 | 0 | 0 |
| 0     | -0.5  | 3 | 1 | 1 | 1 | 0 | 0 | 0 | 0 |
| 0     | 0     | 3 | 1 | 1 | 1 | 3 | 1 | 1 | 1 |
| 0     | 0     | 0 | 0 | 0 | 0 | 0 | 0 | 0 | 0 |
| 0     | 0     | 0 | 0 | 0 | 0 | 2 | 1 | 0 | 1 |

| starburst | starburst-frequency | starburst-severity | starburst-bortherosome | hazy vision | hazy vision-frequency | hazy vision-severity |   |
|-----------|---------------------|--------------------|------------------------|-------------|-----------------------|----------------------|---|
| 0         | 0                   | 0                  | 0                      | 0           | 3                     | 1                    | 1 |
| 0         | 0                   | 0                  | 0                      | 0           | 5                     | 2                    | 2 |
| 2         | 1                   | 0                  | 1                      | 1           | 3                     | 1                    | 1 |
| 2         | 1                   | 0                  | 1                      | 1           | 0                     | 0                    | 0 |
| 0         | 0                   | 0                  | 0                      | 0           | 0                     | 0                    | 0 |
| 0         | 0                   | 0                  | 0                      | 0           | 2                     | 1                    | 1 |
| 0         | 0                   | 0                  | 0                      | 0           | 0                     | 0                    | 0 |
| 3         | 1                   | 1                  | 1                      | 1           | 3                     | 1                    | 1 |
| 3         | 1                   | 1                  | 1                      | 1           | 0                     | 0                    | 0 |
| 0         | 0                   | 0                  | 0                      | 0           | 0                     | 0                    | 0 |
| 0         | 0                   | 0                  | 0                      | 0           | 0                     | 0                    | 0 |
| 2         | 1                   | 1                  | 0                      | 0           | 0                     | 0                    | 0 |
| 0         | 0                   | 0                  | 0                      | 0           | 1                     | 1                    | 0 |
| 3         | 2                   | 1                  | 0                      | 0           | 3                     | 1                    | 1 |
| 3         | 1                   | 1                  | 1                      | 1           | 1                     | 1                    | 0 |
| 0         | 0                   | 0                  | 0                      | 0           | 0                     | 0                    | 0 |
| 0         | 0                   | 0                  | 0                      | 0           | 0                     | 0                    | 0 |
| 0         | 0                   | 0                  | 0                      | 0           | 3                     | 1                    | 1 |
| 2         | 1                   | 1                  | 0                      | 0           | 0                     | 0                    | 0 |
| 0         | 0                   | 0                  | 0                      | 0           | 0                     | 0                    | 0 |
| 0         | 0                   | 0                  | 0                      | 0           | 3                     | 1                    | 1 |
| 0         | 0                   | 0                  | 0                      | 0           | 0                     | 0                    | 0 |
| 0         | 0                   | 0                  | 0                      | 0           | 3                     | 1                    | 1 |
| 4         | 0                   | 2                  | 2                      | 2           | 9                     | 3                    | 3 |
| 0         | 0                   | 0                  | 0                      | 0           | 0                     | 0                    | 0 |
| 6         | 3                   | 2                  | 1                      | 1           | 3                     | 1                    | 1 |
| 0         | 0                   | 0                  | 0                      | 0           | 3                     | 1                    | 1 |
| 0         | 0                   | 0                  | 0                      | 0           | 0                     | 0                    | 0 |
| 0         | 0                   | 0                  | 0                      | 0           | 0                     | 0                    | 0 |
| 0         | 0                   | 0                  | 0                      | 0           | 0                     | 0                    | 0 |
| 0         | 0                   | 0                  | 0                      | 0           | 3                     | 1                    | 1 |
| 0         | 0                   | 0                  | 0                      | 0           | 0                     | 0                    | 0 |
| 0         | 0                   | 0                  | 0                      | 0           | 0                     | 0                    | 0 |
| 0         | 0                   | 0                  | 0                      | 0           | 3                     | 1                    | 1 |
| 0         | 0                   | 0                  | 0                      | 0           | 0                     | 0                    | 0 |
| 0         | 0                   | 0                  | 0                      | 0           | 0                     | 0                    | 0 |
| 5         | 2                   | 2                  | 1                      | 1           | 1                     | 1                    | 0 |
| 0         | 0                   | 0                  | 0                      | 0           | 3                     | 1                    | 1 |
| 0         | 0                   | 0                  | 0                      | 0           | 2                     | 1                    | 1 |
| 0         | 0                   | 0                  | 0                      | 0           | 4                     | 1                    | 2 |
| 4         | 2                   | 1                  | 1                      | 1           | 0                     | 0                    | 0 |
| 0         | 0                   | 0                  | 0                      | 0           | 0                     | 0                    | 0 |
| 0         | 0                   | 0                  | 0                      | 0           | 0                     | 0                    | 0 |
| 0         | 0                   | 0                  | 0                      | 0           | 0                     | 0                    | 0 |
| 2         | 1                   | 1                  | 0                      | 0           | 0                     | 0                    | 0 |
| 0         | 0                   | 0                  | 0                      | 0           | 3                     | 1                    | 1 |
| 5         | 2                   | 2                  | 1                      | 1           | 0                     | 0                    | 0 |
| 0         | 0                   | 0                  | 0                      | 0           | 1                     | 1                    | 0 |
| 0         | 0                   | 0                  | 0                      | 0           | 0                     | 0                    | 0 |
| 2         | 1                   | 1                  | 0                      | 0           | 0                     | 0                    | 0 |
| 4         | 2                   | 1                  | 1                      | 1           | 5                     | 1                    | 2 |

|   |   |   |   |   |   |   |
|---|---|---|---|---|---|---|
| 0 | 0 | 0 | 0 | 2 | 1 | 1 |
| 0 | 0 | 0 | 0 | 0 | 0 | 0 |
| 2 | 1 | 1 | 0 | 2 | 1 | 1 |
| 2 | 1 | 1 | 0 | 0 | 0 | 0 |
| 0 | 0 | 0 | 0 | 0 | 0 | 0 |
| 0 | 0 | 0 | 0 | 3 | 1 | 1 |
| 0 | 0 | 0 | 0 | 0 | 0 | 0 |
| 0 | 0 | 0 | 0 | 0 | 0 | 0 |
| 3 | 1 | 1 | 1 | 0 | 0 | 0 |
| 0 | 0 | 0 | 0 | 3 | 1 | 1 |
| 3 | 1 | 1 | 1 | 0 | 0 | 0 |
| 0 | 0 | 0 | 0 | 3 | 1 | 1 |
| 6 | 3 | 1 | 2 | 3 | 1 | 1 |
| 3 | 1 | 1 | 1 | 0 | 0 | 0 |
| 2 | 1 | 1 | 0 | 4 | 2 | 1 |
| 0 | 0 | 0 | 0 | 2 | 1 | 1 |
| 0 | 0 | 0 | 0 | 0 | 0 | 0 |
| 2 | 1 | 1 | 0 | 3 | 1 | 1 |
| 5 | 3 | 1 | 1 | 4 | 2 | 1 |
| 2 | 1 | 1 | 0 | 3 | 1 | 1 |
| 3 | 1 | 1 | 1 | 5 | 3 | 1 |
| 2 | 1 | 1 | 0 | 0 | 0 | 0 |
| 0 | 0 | 0 | 0 | 2 | 1 | 1 |
| 0 | 0 | 0 | 0 | 0 | 0 | 0 |
| 0 | 0 | 0 | 0 | 3 | 1 | 1 |
| 2 | 1 | 1 | 0 | 0 | 0 | 0 |
| 0 | 0 | 0 | 0 | 0 | 0 | 0 |
| 0 | 0 | 0 | 0 | 0 | 0 | 0 |
| 0 | 0 | 0 | 0 | 0 | 0 | 0 |
| 0 | 0 | 0 | 0 | 3 | 1 | 1 |
| 0 | 0 | 0 | 0 | 0 | 0 | 0 |
| 0 | 0 | 0 | 0 | 0 | 0 | 0 |
| 0 | 0 | 0 | 0 | 0 | 0 | 0 |
| 0 | 0 | 0 | 0 | 0 | 0 | 0 |
| 0 | 0 | 0 | 0 | 0 | 0 | 0 |
| 2 | 1 | 1 | 0 | 0 | 0 | 0 |
| 0 | 0 | 0 | 0 | 0 | 0 | 0 |
| 0 | 0 | 0 | 0 | 0 | 0 | 0 |
| 2 | 1 | 1 | 0 | 0 | 0 | 0 |
| 2 | 1 | 1 | 0 | 0 | 0 | 0 |
| 0 | 0 | 0 | 0 | 1 | 1 | 0 |
| 0 | 0 | 0 | 0 | 3 | 1 | 1 |
| 2 | 1 | 1 | 0 | 1 | 1 | 0 |
| 3 | 1 | 1 | 1 | 3 | 1 | 1 |
| 0 | 0 | 0 | 0 | 0 | 0 | 0 |
| 0 | 0 | 0 | 0 | 0 | 0 | 0 |
| 2 | 1 | 1 | 0 | 0 | 0 | 0 |
| 4 | 2 | 1 | 1 | 0 | 0 | 0 |
| 0 | 0 | 0 | 0 | 3 | 1 | 1 |
| 2 | 1 | 1 | 0 | 3 | 1 | 1 |
| 0 | 0 | 0 | 0 | 3 | 1 | 1 |

|   |   |   |   |   |   |   |
|---|---|---|---|---|---|---|
| 3 | 1 | 1 | 1 | 3 | 1 | 1 |
| 0 | 0 | 0 | 0 | 1 | 1 | 0 |
| 1 | 1 | 0 | 0 | 0 | 0 | 0 |
| 0 | 0 | 0 | 0 | 3 | 1 | 1 |
| 0 | 0 | 0 | 0 | 0 | 0 | 0 |
| 0 | 0 | 0 | 0 | 2 | 1 | 1 |
| 0 | 0 | 0 | 0 | 3 | 1 | 1 |
| 0 | 0 | 0 | 0 | 0 | 0 | 0 |
| 0 | 0 | 0 | 0 | 0 | 0 | 0 |
| 3 | 1 | 1 | 1 | 0 | 0 | 0 |
| 3 | 1 | 1 | 1 | 0 | 0 | 0 |
| 3 | 1 | 1 | 1 | 0 | 0 | 0 |
| 0 | 0 | 0 | 0 | 0 | 0 | 0 |
| 0 | 0 | 0 | 0 | 0 | 0 | 0 |
| 0 | 0 | 0 | 0 | 0 | 0 | 0 |
| 2 | 1 | 1 | 0 | 3 | 1 | 1 |
| 3 | 1 | 1 | 1 | 3 | 1 | 1 |
| 0 | 0 | 0 | 0 | 0 | 0 | 0 |
| 1 | 1 | 0 | 0 | 2 | 1 | 1 |
| 0 | 0 | 0 | 0 | 3 | 1 | 1 |
| 4 | 1 | 1 | 2 | 0 | 0 | 0 |
| 3 | 1 | 1 | 1 | 4 | 1 | 2 |
| 4 | 1 | 1 | 2 | 0 | 0 | 0 |
| 0 | 0 | 0 | 0 | 3 | 1 | 1 |
| 8 | 3 | 3 | 2 | 0 | 0 | 0 |
| 0 | 0 | 0 | 0 | 3 | 1 | 1 |
| 3 | 1 | 1 | 1 | 3 | 1 | 1 |
| 5 | 2 | 2 | 1 | 0 | 0 | 0 |
| 0 | 0 | 0 | 0 | 3 | 1 | 1 |
| 0 | 0 | 0 | 0 | 0 | 0 | 0 |
| 0 | 0 | 0 | 0 | 1 | 1 | 0 |
| 0 | 0 | 0 | 0 | 3 | 1 | 1 |
| 3 | 1 | 1 | 1 | 0 | 0 | 0 |
| 0 | 0 | 0 | 0 | 0 | 0 | 0 |
| 0 | 0 | 0 | 0 | 3 | 1 | 1 |

| borthersome | blurred vision | blurred vision-frequency | blurred vision-severity | blurred vision-borthersome | distortion | distortion-frequency | distortion-severity |
|-------------|----------------|--------------------------|-------------------------|----------------------------|------------|----------------------|---------------------|
| 1           | 0              | 0                        | 0                       | 0                          | 0          | 0                    | 0                   |
| 1           | 3              | 1                        | 1                       | 1                          | 0          | 0                    | 0                   |
| 1           | 0              | 0                        | 0                       | 0                          | 0          | 0                    | 0                   |
| 0           | 2              | 1                        | 0                       | 1                          | 0          | 0                    | 0                   |
| 0           | 0              | 0                        | 0                       | 0                          | 0          | 0                    | 0                   |
| 0           | 2              | 1                        | 1                       | 0                          | 0          | 0                    | 0                   |
| 0           | 3              | 1                        | 1                       | 1                          | 0          | 0                    | 0                   |
| 1           | 3              | 1                        | 1                       | 1                          | 0          | 0                    | 0                   |
| 0           | 1              | 1                        | 0                       | 0                          | 0          | 0                    | 0                   |
| 0           | 0              | 0                        | 0                       | 0                          | 0          | 0                    | 0                   |
| 0           | 0              | 0                        | 0                       | 0                          | 0          | 0                    | 0                   |
| 0           | 0              | 0                        | 0                       | 0                          | 0          | 0                    | 0                   |
| 0           | 0              | 0                        | 0                       | 0                          | 0          | 0                    | 0                   |
| 1           | 0              | 0                        | 0                       | 0                          | 0          | 0                    | 0                   |
| 0           | 0              | 0                        | 0                       | 0                          | 0          | 0                    | 0                   |
| 0           | 0              | 0                        | 0                       | 0                          | 0          | 0                    | 0                   |
| 0           | 0              | 0                        | 0                       | 0                          | 0          | 0                    | 0                   |
| 1           | 3              | 1                        | 1                       | 1                          | 0          | 0                    | 0                   |
| 0           | 0              | 0                        | 0                       | 0                          | 0          | 0                    | 0                   |
| 0           | 0              | 0                        | 0                       | 0                          | 0          | 0                    | 0                   |
| 0           | 0              | 0                        | 0                       | 0                          | 0          | 0                    | 0                   |
| 1           | 3              | 1                        | 1                       | 1                          | 0          | 0                    | 0                   |
| 0           | 0              | 0                        | 0                       | 0                          | 0          | 0                    | 0                   |
| 1           | 0              | 0                        | 0                       | 0                          | 0          | 0                    | 0                   |
| 3           | 8              | 3                        | 2                       | 3                          | 0          | 0                    | 0                   |
| 0           | 0              | 0                        | 0                       | 0                          | 0          | 0                    | 0                   |
| 1           | 3              | 1                        | 1                       | 1                          | 0          | 0                    | 0                   |
| 1           | 2              | 1                        | 1                       | 0                          | 0          | 0                    | 0                   |
| 0           | 1              | 1                        | 0                       | 0                          | 0          | 0                    | 0                   |
| 0           | 3              | 1                        | 1                       | 1                          | 0          | 0                    | 0                   |
| 0           | 3              | 1                        | 1                       | 1                          | 0          | 0                    | 0                   |
| 1           | 3              | 1                        | 1                       | 1                          | 0          | 0                    | 0                   |
| 0           | 0              | 0                        | 0                       | 0                          | 0          | 0                    | 0                   |
| 0           | 0              | 0                        | 0                       | 0                          | 0          | 0                    | 0                   |
| 0           | 0              | 0                        | 0                       | 0                          | 0          | 0                    | 0                   |
| 0           | 2              | 1                        | 0                       | 1                          | 0          | 0                    | 0                   |
| 1           | 3              | 1                        | 1                       | 1                          | 0          | 0                    | 0                   |
| 0           | 1              | 1                        | 0                       | 0                          | 0          | 0                    | 0                   |
| 1           | 0              | 0                        | 0                       | 0                          | 0          | 0                    | 0                   |
| 0           | 1              | 1                        | 0                       | 0                          | 0          | 0                    | 0                   |
| 0           | 0              | 0                        | 0                       | 0                          | 0          | 0                    | 0                   |
| 0           | 0              | 0                        | 0                       | 0                          | 0          | 0                    | 0                   |
| 0           | 0              | 0                        | 0                       | 0                          | 0          | 0                    | 0                   |
| 0           | 0              | 0                        | 0                       | 0                          | 0          | 0                    | 0                   |
| 1           | 3              | 1                        | 1                       | 1                          | 0          | 0                    | 0                   |
| 0           | 0              | 0                        | 0                       | 0                          | 0          | 0                    | 0                   |
| 0           | 1              | 1                        | 0                       | 0                          | 0          | 0                    | 0                   |
| 0           | 3              | 1                        | 1                       | 1                          | 0          | 0                    | 0                   |
| 0           | 0              | 0                        | 0                       | 0                          | 0          | 0                    | 0                   |
| 2           | 3              | 1                        | 1                       | 1                          | 0          | 0                    | 0                   |

|   |   |   |   |   |   |   |   |
|---|---|---|---|---|---|---|---|
| 0 | 0 | 0 | 0 | 0 | 0 | 0 | 0 |
| 0 | 2 | 1 | 1 | 0 | 0 | 0 | 0 |
| 0 | 0 | 0 | 0 | 0 | 0 | 0 | 0 |
| 0 | 5 | 2 | 2 | 1 | 0 | 0 | 0 |
| 0 | 3 | 1 | 1 | 1 | 0 | 0 | 0 |
| 1 | 3 | 1 | 1 | 1 | 0 | 0 | 0 |
| 0 | 0 | 0 | 0 | 0 | 0 | 0 | 0 |
| 0 | 0 | 0 | 0 | 0 | 0 | 0 | 0 |
| 0 | 1 | 1 | 0 | 0 | 0 | 0 | 0 |
| 1 | 0 | 0 | 0 | 0 | 0 | 0 | 0 |
| 0 | 0 | 0 | 0 | 0 | 0 | 0 | 0 |
| 1 | 3 | 1 | 1 | 1 | 0 | 0 | 0 |
| 1 | 8 | 3 | 2 | 3 | 0 | 0 | 0 |
| 0 | 2 | 1 | 1 | 0 | 0 | 0 | 0 |
| 1 | 4 | 1 | 2 | 1 | 0 | 0 | 0 |
| 0 | 0 | 0 | 0 | 0 | 0 | 0 | 0 |
| 0 | 2 | 1 | 1 | 0 | 0 | 0 | 0 |
| 1 | 3 | 1 | 1 | 1 | 0 | 0 | 0 |
| 1 | 3 | 1 | 1 | 1 | 0 | 0 | 0 |
| 1 | 2 | 1 | 1 | 0 | 2 | 1 | 1 |
| 1 | 5 | 3 | 1 | 1 | 3 | 1 | 1 |
| 0 | 0 | 0 | 0 | 0 | 0 | 0 | 0 |
| 0 | 0 | 0 | 0 | 0 | 0 | 0 | 0 |
| 0 | 0 | 0 | 0 | 0 | 0 | 0 | 0 |
| 1 | 3 | 1 | 1 | 1 | 0 | 0 | 0 |
| 0 | 0 | 0 | 0 | 0 | 0 | 0 | 0 |
| 0 | 0 | 0 | 0 | 0 | 0 | 0 | 0 |
| 0 | 0 | 0 | 0 | 0 | 0 | 0 | 0 |
| 0 | 0 | 0 | 0 | 0 | 0 | 0 | 0 |
| 1 | 4 | 2 | 1 | 1 | 0 | 0 | 0 |
| 0 | 0 | 0 | 0 | 0 | 0 | 0 | 0 |
| 0 | 5 | 1 | 3 | 1 | 0 | 0 | 0 |
| 0 | 0 | 0 | 0 | 0 | 0 | 0 | 0 |
| 0 | 2 | 1 | 0 | 1 | 0 | 0 | 0 |
| 0 | 2 | 1 | 1 | 0 | 0 | 0 | 0 |
| 0 | 0 | 0 | 0 | 0 | 0 | 0 | 0 |
| 0 | 3 | 1 | 1 | 1 | 0 | 0 | 0 |
| 0 | 0 | 0 | 0 | 0 | 0 | 0 | 0 |
| 1 | 4 | 2 | 1 | 1 | 0 | 0 | 0 |
| 0 | 3 | 1 | 1 | 1 | 0 | 0 | 0 |
| 1 | 3 | 1 | 1 | 1 | 0 | 0 | 0 |
| 0 | 3 | 1 | 1 | 1 | 0 | 0 | 0 |
| 0 | 4 | 2 | 1 | 1 | 0 | 0 | 0 |
| 0 | 0 | 0 | 0 | 0 | 0 | 0 | 0 |
| 0 | 5 | 2 | 2 | 1 | 0 | 0 | 0 |
| 1 | 3 | 1 | 1 | 1 | 0 | 0 | 0 |
| 1 | 3 | 1 | 1 | 1 | 0 | 0 | 0 |
| 1 | 3 | 1 | 1 | 1 | 0 | 0 | 0 |

|   |   |   |   |   |   |   |   |
|---|---|---|---|---|---|---|---|
| 1 | 3 | 1 | 1 | 1 | 0 | 0 | 0 |
| 0 | 0 | 0 | 0 | 0 | 0 | 0 | 0 |
| 0 | 0 | 0 | 0 | 0 | 0 | 0 | 0 |
| 1 | 3 | 1 | 1 | 1 | 0 | 0 | 0 |
| 0 | 0 | 0 | 0 | 0 | 0 | 0 | 0 |
| 0 | 3 | 1 | 1 | 1 | 0 | 0 | 0 |
| 1 | 3 | 1 | 1 | 1 | 0 | 0 | 0 |
| 0 | 0 | 0 | 0 | 0 | 0 | 0 | 0 |
| 0 | 3 | 1 | 1 | 1 | 0 | 0 | 0 |
| 0 | 0 | 0 | 0 | 0 | 0 | 0 | 0 |
| 0 | 0 | 0 | 0 | 0 | 0 | 0 | 0 |
| 0 | 3 | 1 | 1 | 1 | 0 | 0 | 0 |
| 0 | 0 | 0 | 0 | 0 | 0 | 0 | 0 |
| 0 | 3 | 1 | 1 | 1 | 0 | 0 | 0 |
| 1 | 3 | 1 | 1 | 1 | 0 | 0 | 0 |
| 1 | 2 | 1 | 1 | 0 | 0 | 0 | 0 |
| 0 | 2 | 1 | 1 | 0 | 0 | 0 | 0 |
| 0 | 2 | 1 | 1 | 0 | 0 | 0 | 0 |
| 1 | 1 | 1 | 0 | 0 | 0 | 0 | 0 |
| 0 | 0 | 0 | 0 | 0 | 0 | 0 | 0 |
| 1 | 4 | 1 | 1 | 2 | 0 | 0 | 0 |
| 0 | 0 | 0 | 0 | 0 | 0 | 0 | 0 |
| 1 | 0 | 0 | 0 | 0 | 0 | 0 | 0 |
| 0 | 2 | 1 | 1 | 0 | 0 | 0 | 0 |
| 1 | 4 | 1 | 2 | 1 | 0 | 0 | 0 |
| 1 | 3 | 1 | 1 | 1 | 0 | 0 | 0 |
| 0 | 2 | 1 | 1 | 0 | 2 | 1 | 1 |
| 1 | 3 | 1 | 1 | 1 | 0 | 0 | 0 |
| 0 | 0 | 0 | 0 | 0 | 0 | 0 | 0 |
| 0 | 0 | 0 | 0 | 0 | 0 | 0 | 0 |
| 1 | 4 | 2 | 1 | 1 | 0 | 0 | 0 |
| 0 | 3 | 1 | 1 | 1 | 0 | 0 | 0 |
| 0 | 3 | 1 | 1 | 1 | 0 | 0 | 0 |
| 1 | 3 | 2 | 0 | 1 | 0 | 0 | 0 |

| distortion-<br>bothersome | double images | double images-<br>frequency | double images-<br>severity | double<br>images-<br>bothersome | fluctuation<br>in vision |
|---------------------------|---------------|-----------------------------|----------------------------|---------------------------------|--------------------------|
| 0                         | 0             | 0                           | 0                          | 0                               | 2                        |
| 0                         | 3             | 1                           | 1                          | 1                               | 3                        |
| 0                         | 0             | 0                           | 0                          | 0                               | 3                        |
| 0                         | 0             | 0                           | 0                          | 0                               | 0                        |
| 0                         | 4             | 1                           | 1                          | 2                               | 5                        |
| 0                         | 0             | 0                           | 0                          | 0                               | 2                        |
| 0                         | 0             | 0                           | 0                          | 0                               | 3                        |
| 0                         | 4             | 2                           | 1                          | 1                               | 2                        |
| 0                         | 0             | 0                           | 0                          | 0                               | 2                        |
| 0                         | 0             | 0                           | 0                          | 0                               | 0                        |
| 0                         | 0             | 0                           | 0                          | 0                               | 1                        |
| 0                         | 0             | 0                           | 0                          | 0                               | 0                        |
| 0                         | 0             | 0                           | 0                          | 0                               | 1                        |
| 0                         | 0             | 0                           | 0                          | 0                               | 3                        |
| 0                         | 0             | 0                           | 0                          | 0                               | 2                        |
| 0                         | 0             | 0                           | 0                          | 0                               | 0                        |
| 0                         | 0             | 0                           | 0                          | 0                               | 0                        |
| 0                         | 0             | 0                           | 0                          | 0                               | 3                        |
| 0                         | 0             | 0                           | 0                          | 0                               | 3                        |
| 0                         | 0             | 0                           | 0                          | 0                               | 0                        |
| 0                         | 3             | 1                           | 1                          | 1                               | 3                        |
| 0                         | 0             | 0                           | 0                          | 0                               | 3                        |
| 0                         | 0             | 0                           | 0                          | 0                               | 2                        |
| 0                         | 0             | 0                           | 0                          | 0                               | 8                        |
| 0                         | 0             | 0                           | 0                          | 0                               | 0                        |
| 0                         | 3             | 1                           | 1                          | 1                               | 3                        |
| 0                         | 3             | 1                           | 1                          | 1                               | 3                        |
| 0                         | 0             | 0                           | 0                          | 0                               | 3                        |
| 0                         | 3             | 1                           | 1                          | 1                               | 3                        |
| 0                         | 0             | 0                           | 0                          | 0                               | 1                        |
| 0                         | 3             | 1                           | 1                          | 1                               | 0                        |
| 0                         | 0             | 0                           | 0                          | 0                               | 3                        |
| 0                         | 0             | 0                           | 0                          | 0                               | 3                        |
| 0                         | 0             | 0                           | 0                          | 0                               | 0                        |
| 0                         | 0             | 0                           | 0                          | 0                               | 0                        |
| 0                         | 0             | 0                           | 0                          | 0                               | 3                        |
| 0                         | 1             | 1                           | 0                          | 0                               | 1                        |
| 0                         | 4             | 1                           | 2                          | 1                               | 4                        |
| 0                         | 0             | 0                           | 0                          | 0                               | 0                        |
| 0                         | 0             | 0                           | 0                          | 0                               | 0                        |
| 0                         | 0             | 0                           | 0                          | 0                               | 2                        |
| 0                         | 0             | 0                           | 0                          | 0                               | 0                        |
| 0                         | 0             | 0                           | 0                          | 0                               | 3                        |
| 0                         | 0             | 0                           | 0                          | 0                               | 3                        |
| 0                         | 0             | 0                           | 0                          | 0                               | 0                        |
| 0                         | 3             | 1                           | 1                          | 1                               | 1                        |
| 0                         | 0             | 0                           | 0                          | 0                               | 3                        |
| 0                         | 0             | 0                           | 0                          | 0                               | 4                        |
| 0                         | 3             | 1                           | 1                          | 1                               | 3                        |



|   |   |   |   |   |   |
|---|---|---|---|---|---|
| 0 | 0 | 0 | 0 | 0 | 2 |
| 0 | 0 | 0 | 0 | 0 | 2 |
| 0 | 0 | 0 | 0 | 0 | 0 |
| 0 | 0 | 0 | 0 | 0 | 2 |
| 0 | 0 | 0 | 0 | 0 | 0 |
| 0 | 3 | 1 | 1 | 1 | 3 |
| 0 | 0 | 0 | 0 | 0 | 2 |
| 0 | 0 | 0 | 0 | 0 | 1 |
| 0 | 0 | 0 | 0 | 0 | 0 |
| 0 | 3 | 1 | 1 | 1 | 3 |
| 0 | 0 | 0 | 0 | 0 | 2 |
| 0 | 3 | 1 | 1 | 1 | 3 |
| 0 | 3 | 1 | 1 | 1 | 3 |
| 0 | 0 | 0 | 0 | 0 | 4 |
| 0 | 0 | 0 | 0 | 0 | 0 |
| 0 | 0 | 0 | 0 | 0 | 2 |
| 0 | 0 | 0 | 0 | 0 | 0 |
| 0 | 0 | 0 | 0 | 0 | 3 |
| 0 | 0 | 0 | 0 | 0 | 4 |
| 0 | 1 | 1 | 0 | 0 | 1 |
| 1 | 3 | 1 | 1 | 1 | 3 |
| 0 | 3 | 1 | 1 | 1 | 3 |
| 0 | 0 | 0 | 0 | 0 | 3 |
| 0 | 0 | 0 | 0 | 0 | 3 |
| 0 | 0 | 0 | 0 | 0 | 3 |
| 0 | 0 | 0 | 0 | 0 | 1 |
| 0 | 0 | 0 | 0 | 0 | 3 |
| 0 | 0 | 0 | 0 | 0 | 2 |
| 0 | 0 | 0 | 0 | 0 | 0 |
| 0 | 0 | 0 | 0 | 0 | 3 |
| 0 | 0 | 0 | 0 | 0 | 2 |
| 0 | 0 | 0 | 0 | 0 | 5 |
| 0 | 0 | 0 | 0 | 0 | 3 |
| 0 | 0 | 0 | 0 | 0 | 1 |
| 0 | 2 | 1 | 1 | 0 | 0 |
| 0 | 0 | 0 | 0 | 0 | 3 |
| 0 | 0 | 0 | 0 | 0 | 3 |
| 0 | 0 | 0 | 0 | 0 | 0 |
| 0 | 0 | 0 | 0 | 0 | 3 |
| 0 | 1 | 1 | 0 | 0 | 0 |
| 0 | 3 | 1 | 1 | 1 | 3 |
| 0 | 3 | 1 | 1 | 1 | 3 |
| 0 | 0 | 0 | 0 | 0 | 3 |
| 0 | 0 | 0 | 0 | 0 | 3 |
| 0 | 3 | 1 | 1 | 1 | 1 |
| 0 | 0 | 0 | 0 | 0 | 5 |
| 0 | 0 | 0 | 0 | 0 | 3 |
| 0 | 0 | 0 | 0 | 0 | 3 |

|   |   |   |   |   |   |
|---|---|---|---|---|---|
| 0 | 0 | 0 | 0 | 0 | 3 |
| 0 | 0 | 0 | 0 | 0 | 3 |
| 0 | 0 | 0 | 0 | 0 | 0 |
| 0 | 0 | 0 | 0 | 0 | 3 |
| 0 | 0 | 0 | 0 | 0 | 0 |
| 0 | 0 | 0 | 0 | 0 | 3 |
| 0 | 3 | 1 | 1 | 1 | 3 |
| 0 | 0 | 0 | 0 | 0 | 0 |
| 0 | 0 | 0 | 0 | 0 | 3 |
| 0 | 0 | 0 | 0 | 0 | 0 |
| 0 | 0 | 0 | 0 | 0 | 3 |
| 0 | 0 | 0 | 0 | 0 | 2 |
| 0 | 0 | 0 | 0 | 0 | 0 |
| 0 | 0 | 0 | 0 | 0 | 3 |
| 0 | 0 | 0 | 0 | 0 | 0 |
| 0 | 0 | 0 | 0 | 0 | 3 |
| 0 | 0 | 0 | 0 | 0 | 2 |
| 0 | 0 | 0 | 0 | 0 | 2 |
| 0 | 0 | 0 | 0 | 0 | 3 |
| 0 | 0 | 0 | 0 | 0 | 0 |
| 0 | 4 | 1 | 2 | 2 | 5 |
| 0 | 0 | 0 | 0 | 0 | 3 |
| 0 | 3 | 1 | 1 | 1 | 4 |
| 0 | 0 | 0 | 0 | 0 | 0 |
| 0 | 0 | 0 | 0 | 0 | 3 |
| 0 | 0 | 0 | 0 | 0 | 0 |
| 0 | 2 | 1 | 1 | 0 | 0 |
| 0 | 3 | 1 | 1 | 1 | 2 |
| 0 | 0 | 0 | 0 | 0 | 0 |
| 0 | 2 | 1 | 1 | 0 | 2 |
| 0 | 0 | 0 | 0 | 0 | 5 |
| 0 | 3 | 1 | 1 | 1 | 3 |
| 0 | 0 | 0 | 0 | 0 | 0 |
| 0 | 0 | 0 | 0 | 0 | 0 |

| fluctuation<br>in vision-<br>frequency | fluctuation<br>in vision-<br>severity | fluctuation<br>in vision-<br>bothersome | focusing<br>difficulty | focusing<br>difficulty-<br>frequency | focusing<br>difficulty-<br>severity | focusing<br>difficulty-<br>bothersome |
|----------------------------------------|---------------------------------------|-----------------------------------------|------------------------|--------------------------------------|-------------------------------------|---------------------------------------|
| 1                                      | 1                                     | 0                                       | 1                      | 1                                    | 0                                   | 0                                     |
| 1                                      | 1                                     | 1                                       | 7                      | 3                                    | 2                                   | 2                                     |
| 1                                      | 1                                     | 1                                       | 3                      | 1                                    | 1                                   | 1                                     |
| 0                                      | 0                                     | 0                                       | 0                      | 0                                    | 0                                   | 0                                     |
| 2                                      | 1                                     | 2                                       | 3                      | 1                                    | 1                                   | 1                                     |
| 1                                      | 1                                     | 0                                       | 0                      | 0                                    | 0                                   | 0                                     |
| 1                                      | 1                                     | 1                                       | 0                      | 0                                    | 0                                   | 0                                     |
| 1                                      | 1                                     | 0                                       | 3                      | 1                                    | 1                                   | 1                                     |
| 1                                      | 1                                     | 0                                       | 0                      | 0                                    | 0                                   | 0                                     |
| 0                                      | 0                                     | 0                                       | 0                      | 0                                    | 0                                   | 0                                     |
| 1                                      | 0                                     | 0                                       | 0                      | 0                                    | 0                                   | 0                                     |
| 0                                      | 0                                     | 0                                       | 0                      | 0                                    | 0                                   | 0                                     |
| 1                                      | 0                                     | 0                                       | 0                      | 0                                    | 0                                   | 0                                     |
| 1                                      | 1                                     | 1                                       | 0                      | 0                                    | 0                                   | 0                                     |
| 1                                      | 1                                     | 0                                       | 0                      | 0                                    | 0                                   | 0                                     |
| 0                                      | 0                                     | 0                                       | 0                      | 0                                    | 0                                   | 0                                     |
| 0                                      | 0                                     | 0                                       | 0                      | 0                                    | 0                                   | 0                                     |
| 1                                      | 1                                     | 1                                       | 3                      | 1                                    | 1                                   | 1                                     |
| 1                                      | 1                                     | 1                                       | 0                      | 0                                    | 0                                   | 0                                     |
| 0                                      | 0                                     | 0                                       | 0                      | 0                                    | 0                                   | 0                                     |
| 1                                      | 1                                     | 1                                       | 3                      | 1                                    | 1                                   | 1                                     |
| 1                                      | 1                                     | 1                                       | 0                      | 0                                    | 0                                   | 0                                     |
| 1                                      | 1                                     | 0                                       | 0                      | 0                                    | 0                                   | 0                                     |
| 3                                      | 2                                     | 3                                       | 7                      | 3                                    | 2                                   | 2                                     |
| 0                                      | 0                                     | 0                                       | 0                      | 0                                    | 0                                   | 0                                     |
| 1                                      | 1                                     | 1                                       | 0                      | 0                                    | 0                                   | 0                                     |
| 1                                      | 1                                     | 1                                       | 3                      | 1                                    | 1                                   | 1                                     |
| 1                                      | 1                                     | 1                                       | 0                      | 0                                    | 0                                   | 0                                     |
| 1                                      | 1                                     | 1                                       | 0                      | 0                                    | 0                                   | 0                                     |
| 1                                      | 0                                     | 0                                       | 0                      | 0                                    | 0                                   | 0                                     |
| 0                                      | 0                                     | 0                                       | 0                      | 0                                    | 0                                   | 0                                     |
| 1                                      | 1                                     | 1                                       | 3                      | 1                                    | 1                                   | 1                                     |
| 1                                      | 1                                     | 1                                       | 3                      | 1                                    | 1                                   | 1                                     |
| 0                                      | 0                                     | 0                                       | 0                      | 0                                    | 0                                   | 0                                     |
| 0                                      | 0                                     | 0                                       | 0                      | 0                                    | 0                                   | 0                                     |
| 1                                      | 1                                     | 1                                       | 1                      | 1                                    | 0                                   | 0                                     |
| 1                                      | 0                                     | 0                                       | 0                      | 0                                    | 0                                   | 0                                     |
| 2                                      | 1                                     | 1                                       | 3                      | 1                                    | 1                                   | 1                                     |
| 0                                      | 0                                     | 0                                       | 0                      | 0                                    | 0                                   | 0                                     |
| 0                                      | 0                                     | 0                                       | 0                      | 0                                    | 0                                   | 0                                     |
| 1                                      | 1                                     | 0                                       | 0                      | 0                                    | 0                                   | 0                                     |
| 0                                      | 0                                     | 0                                       | 0                      | 0                                    | 0                                   | 0                                     |
| 1                                      | 1                                     | 1                                       | 2                      | 1                                    | 1                                   | 0                                     |
| 1                                      | 1                                     | 1                                       | 3                      | 1                                    | 1                                   | 1                                     |
| 0                                      | 0                                     | 0                                       | 0                      | 0                                    | 0                                   | 0                                     |
| 1                                      | 0                                     | 0                                       | 0                      | 0                                    | 0                                   | 0                                     |
| 1                                      | 1                                     | 1                                       | 0                      | 0                                    | 0                                   | 0                                     |
| 1                                      | 2                                     | 1                                       | 3                      | 1                                    | 1                                   | 1                                     |
| 1                                      | 1                                     | 1                                       | 4                      | 1                                    | 2                                   | 1                                     |

|   |   |   |   |   |   |   |
|---|---|---|---|---|---|---|
| 1 | 1 | 0 | 0 | 0 | 0 | 0 |
| 1 | 1 | 0 | 3 | 1 | 1 | 1 |
| 0 | 0 | 0 | 0 | 0 | 0 | 0 |
| 1 | 1 | 0 | 0 | 0 | 0 | 0 |
| 0 | 0 | 0 | 3 | 1 | 1 | 1 |
| 1 | 1 | 1 | 3 | 1 | 1 | 1 |
| 1 | 1 | 0 | 3 | 1 | 1 | 1 |
| 1 | 0 | 0 | 0 | 0 | 0 | 0 |
| 0 | 0 | 0 | 1 | 1 | 0 | 0 |
| 1 | 1 | 1 | 0 | 0 | 0 | 0 |
| 1 | 1 | 0 | 1 | 1 | 0 | 0 |
| 1 | 1 | 1 | 3 | 1 | 1 | 1 |
| 1 | 1 | 1 | 9 | 3 | 3 | 3 |
| 2 | 1 | 1 | 0 | 0 | 0 | 0 |
| 0 | 0 | 0 | 0 | 0 | 0 | 0 |
| 1 | 1 | 0 | 3 | 1 | 1 | 1 |
| 0 | 0 | 0 | 1 | 1 | 0 | 0 |
| 1 | 1 | 1 | 0 | 0 | 0 | 0 |
| 2 | 1 | 1 | 3 | 1 | 1 | 1 |
| 1 | 0 | 0 | 5 | 2 | 2 | 1 |
| 1 | 1 | 1 | 3 | 1 | 1 | 1 |
| 1 | 1 | 1 | 2 | 1 | 1 | 0 |
| 2 | 1 | 0 | 2 | 1 | 1 | 0 |
| 1 | 1 | 1 | 0 | 0 | 0 | 0 |
| 1 | 1 | 1 | 0 | 0 | 0 | 0 |
| 1 | 0 | 0 | 0 | 0 | 0 | 0 |
| 1 | 1 | 1 | 3 | 1 | 1 | 1 |
| 1 | 1 | 0 | 2 | 1 | 1 | 0 |
| 0 | 0 | 0 | 0 | 0 | 0 | 0 |
| 1 | 1 | 1 | 3 | 1 | 1 | 1 |
| 1 | 1 | 0 | 0 | 0 | 0 | 0 |
| 1 | 3 | 1 | 3 | 1 | 1 | 1 |
| 1 | 1 | 1 | 3 | 1 | 1 | 1 |
| 1 | 0 | 0 | 0 | 0 | 0 | 0 |
| 0 | 0 | 0 | 1 | 1 | 0 | 0 |
| 1 | 1 | 1 | 0 | 0 | 0 | 0 |
| 1 | 1 | 1 | 3 | 1 | 1 | 1 |
| 0 | 0 | 0 | 0 | 0 | 0 | 0 |
| 1 | 1 | 1 | 6 | 2 | 2 | 2 |
| 0 | 0 | 0 | 0 | 0 | 0 | 0 |
| 1 | 1 | 1 | 3 | 1 | 1 | 1 |
| 1 | 1 | 1 | 3 | 1 | 1 | 1 |
| 1 | 1 | 1 | 0 | 0 | 0 | 0 |
| 1 | 1 | 1 | 3 | 1 | 1 | 1 |
| 0 | 0 | 0 | 3 | 1 | 1 | 1 |
| 2 | 2 | 1 | 3 | 1 | 1 | 1 |
| 1 | 1 | 1 | 3 | 1 | 1 | 1 |
| 1 | 1 | 1 | 3 | 1 | 1 | 1 |

|   |   |   |   |   |   |   |
|---|---|---|---|---|---|---|
| 1 | 1 | 1 | 7 | 3 | 2 | 2 |
| 1 | 1 | 1 | 0 | 0 | 0 | 0 |
| 0 | 0 | 0 | 2 | 1 | 1 | 0 |
| 1 | 1 | 1 | 3 | 1 | 1 | 1 |
| 0 | 0 | 0 | 0 | 0 | 0 | 0 |
| 1 | 1 | 1 | 3 | 1 | 1 | 1 |
| 1 | 1 | 1 | 3 | 1 | 1 | 1 |
| 0 | 0 | 0 | 0 | 0 | 0 | 0 |
| 1 | 1 | 1 | 1 | 1 | 0 | 0 |
| 0 | 0 | 0 | 3 | 1 | 1 | 1 |
| 1 | 1 | 1 | 3 | 1 | 1 | 1 |
| 1 | 1 | 0 | 3 | 1 | 1 | 1 |
| 0 | 0 | 0 | 0 | 0 | 0 | 0 |
| 1 | 1 | 1 | 2 | 1 | 1 | 0 |
| 0 | 0 | 0 | 0 | 0 | 0 | 0 |
| 1 | 1 | 1 | 3 | 1 | 1 | 1 |
| 1 | 1 | 0 | 3 | 1 | 1 | 1 |
| 1 | 1 | 0 | 0 | 0 | 0 | 0 |
| 1 | 1 | 1 | 4 | 2 | 1 | 1 |
| 0 | 0 | 0 | 0 | 0 | 0 | 0 |
| 2 | 1 | 2 | 6 | 2 | 2 | 2 |
| 1 | 1 | 1 | 3 | 1 | 1 | 1 |
| 2 | 1 | 1 | 0 | 0 | 0 | 0 |
| 0 | 0 | 0 | 0 | 0 | 0 | 0 |
| 1 | 1 | 1 | 3 | 1 | 1 | 1 |
| 0 | 0 | 0 | 0 | 0 | 0 | 0 |
| 0 | 0 | 0 | 0 | 0 | 0 | 0 |
| 1 | 0 | 1 | 3 | 1 | 1 | 1 |
| 0 | 0 | 0 | 0 | 0 | 0 | 0 |
| 1 | 1 | 0 | 0 | 0 | 0 | 0 |
| 2 | 1 | 2 | 6 | 2 | 2 | 2 |
| 1 | 1 | 1 | 3 | 1 | 1 | 1 |
| 0 | 0 | 0 | 0 | 0 | 0 | 0 |
| 0 | 0 | 0 | 2 | 1 | 1 | 0 |

| depth perception | depth perception-frequency | depth perception-severity | depth perception-bortherksom | total scores | total socres(ordinal) | total frequency scores | total severity scores |    |
|------------------|----------------------------|---------------------------|------------------------------|--------------|-----------------------|------------------------|-----------------------|----|
| 0                | 0                          | 0                         | 0                            | 0            | 8                     | 1                      | 4                     | 3  |
| 0                | 0                          | 0                         | 0                            | 0            | 21                    | 3                      | 8                     | 7  |
| 0                | 0                          | 0                         | 0                            | 0            | 13                    | 2                      | 5                     | 3  |
| 0                | 0                          | 0                         | 0                            | 0            | 6                     | 1                      | 4                     | 0  |
| 3                | 1                          | 1                         | 1                            | 1            | 18                    | 2                      | 6                     | 5  |
| 0                | 0                          | 0                         | 0                            | 0            | 10                    | 2                      | 5                     | 5  |
| 0                | 0                          | 0                         | 0                            | 0            | 6                     | 1                      | 2                     | 2  |
| 2                | 1                          | 1                         | 1                            | 0            | 27                    | 3                      | 11                    | 9  |
| 0                | 0                          | 0                         | 0                            | 0            | 13                    | 2                      | 6                     | 4  |
| 0                | 0                          | 0                         | 0                            | 0            | 0                     | 1                      | 0                     | 0  |
| 0                | 0                          | 0                         | 0                            | 0            | 4                     | 1                      | 4                     | 0  |
| 0                | 0                          | 0                         | 0                            | 0            | 4                     | 1                      | 2                     | 2  |
| 0                | 0                          | 0                         | 0                            | 0            | 11                    | 2                      | 6                     | 3  |
| 0                | 0                          | 0                         | 0                            | 0            | 15                    | 2                      | 6                     | 5  |
| 0                | 0                          | 0                         | 0                            | 0            | 13                    | 2                      | 6                     | 5  |
| 0                | 0                          | 0                         | 0                            | 0            | 2                     | 1                      | 1                     | 1  |
| 0                | 0                          | 0                         | 0                            | 0            | 0                     | 1                      | 0                     | 0  |
| 0                | 0                          | 0                         | 0                            | 0            | 17                    | 2                      | 6                     | 6  |
| 0                | 0                          | 0                         | 0                            | 0            | 6                     | 1                      | 3                     | 2  |
| 0                | 0                          | 0                         | 0                            | 0            | 2                     | 1                      | 1                     | 1  |
| 0                | 0                          | 0                         | 0                            | 0            | 20                    | 3                      | 7                     | 7  |
| 0                | 0                          | 0                         | 0                            | 0            | 6                     | 1                      | 2                     | 2  |
| 0                | 0                          | 0                         | 0                            | 0            | 13                    | 2                      | 5                     | 5  |
| 9                | 3                          | 3                         | 3                            | 3            | 54                    | 4                      | 17                    | 17 |
| 0                | 0                          | 0                         | 0                            | 0            | 9                     | 1                      | 6                     | 2  |
| 0                | 0                          | 0                         | 0                            | 0            | 18                    | 2                      | 7                     | 6  |
| 0                | 0                          | 0                         | 0                            | 0            | 16                    | 2                      | 6                     | 6  |
| 0                | 0                          | 0                         | 0                            | 0            | 10                    | 2                      | 4                     | 3  |
| 0                | 0                          | 0                         | 0                            | 0            | 12                    | 2                      | 4                     | 4  |
| 0                | 0                          | 0                         | 0                            | 0            | 11                    | 2                      | 5                     | 3  |
| 0                | 0                          | 0                         | 0                            | 0            | 17                    | 2                      | 5                     | 7  |
| 0                | 0                          | 0                         | 0                            | 0            | 12                    | 2                      | 4                     | 4  |
| 0                | 0                          | 0                         | 0                            | 0            | 13                    | 2                      | 4                     | 5  |
| 0                | 0                          | 0                         | 0                            | 0            | 4                     | 1                      | 3                     | 1  |
| 0                | 0                          | 0                         | 0                            | 0            | 15                    | 2                      | 6                     | 5  |
| 0                | 0                          | 0                         | 0                            | 0            | 15                    | 2                      | 6                     | 5  |
| 0                | 0                          | 0                         | 0                            | 0            | 10                    | 2                      | 6                     | 3  |
| 6                | 2                          | 2                         | 2                            | 2            | 27                    | 3                      | 9                     | 10 |
| 0                | 0                          | 0                         | 0                            | 0            | 8                     | 1                      | 4                     | 2  |
| 0                | 0                          | 0                         | 0                            | 0            | 2                     | 1                      | 1                     | 1  |
| 0                | 0                          | 0                         | 0                            | 0            | 5                     | 1                      | 2                     | 2  |
| 0                | 0                          | 0                         | 0                            | 0            | 1                     | 1                      | 1                     | 0  |
| 2                | 1                          | 1                         | 1                            | 0            | 13                    | 2                      | 6                     | 6  |
| 0                | 0                          | 0                         | 0                            | 0            | 17                    | 2                      | 6                     | 6  |
| 3                | 1                          | 1                         | 1                            | 1            | 8                     | 1                      | 3                     | 3  |
| 0                | 0                          | 0                         | 0                            | 0            | 18                    | 2                      | 10                    | 5  |
| 3                | 1                          | 1                         | 1                            | 1            | 15                    | 2                      | 5                     | 5  |
| 0                | 0                          | 0                         | 0                            | 0            | 10                    | 2                      | 4                     | 4  |
| 0                | 0                          | 0                         | 0                            | 0            | 31                    | 4                      | 12                    | 10 |

|   |   |   |   |    |   |    |    |
|---|---|---|---|----|---|----|----|
| 0 | 0 | 0 | 0 | 4  | 1 | 2  | 2  |
| 0 | 0 | 0 | 0 | 8  | 1 | 4  | 3  |
| 0 | 0 | 0 | 0 | 10 | 2 | 4  | 4  |
| 0 | 0 | 0 | 0 | 9  | 1 | 4  | 4  |
| 0 | 0 | 0 | 0 | 9  | 1 | 3  | 3  |
| 0 | 0 | 0 | 0 | 21 | 3 | 7  | 7  |
| 0 | 0 | 0 | 0 | 6  | 1 | 3  | 2  |
| 0 | 0 | 0 | 0 | 3  | 1 | 2  | 1  |
| 0 | 0 | 0 | 0 | 8  | 1 | 4  | 2  |
| 3 | 1 | 1 | 1 | 15 | 2 | 5  | 5  |
| 0 | 0 | 0 | 0 | 10 | 2 | 4  | 4  |
| 0 | 0 | 0 | 0 | 18 | 2 | 6  | 6  |
| 3 | 1 | 1 | 1 | 44 | 4 | 17 | 13 |
| 0 | 0 | 0 | 0 | 9  | 1 | 4  | 3  |
| 0 | 0 | 0 | 0 | 20 | 3 | 9  | 7  |
| 0 | 0 | 0 | 0 | 11 | 2 | 5  | 5  |
| 0 | 0 | 0 | 0 | 5  | 1 | 3  | 2  |
| 0 | 0 | 0 | 0 | 13 | 2 | 5  | 5  |
| 4 | 2 | 1 | 1 | 31 | 4 | 15 | 8  |
| 0 | 0 | 0 | 0 | 19 | 2 | 9  | 7  |
| 3 | 1 | 1 | 1 | 34 | 4 | 14 | 10 |
| 0 | 0 | 0 | 0 | 12 | 2 | 5  | 5  |
| 0 | 0 | 0 | 0 | 19 | 2 | 10 | 7  |
| 0 | 0 | 0 | 0 | 6  | 1 | 2  | 2  |
| 3 | 1 | 1 | 1 | 15 | 2 | 5  | 5  |
| 0 | 0 | 0 | 0 | 8  | 1 | 4  | 3  |
| 0 | 0 | 0 | 0 | 15 | 2 | 6  | 5  |
| 0 | 0 | 0 | 0 | 7  | 1 | 4  | 3  |
| 0 | 0 | 0 | 0 | 3  | 1 | 1  | 1  |
| 0 | 0 | 0 | 0 | 20 | 3 | 8  | 6  |
| 3 | 1 | 1 | 1 | 8  | 1 | 3  | 3  |
| 0 | 0 | 0 | 0 | 19 | 2 | 6  | 9  |
| 0 | 0 | 0 | 0 | 10 | 2 | 4  | 4  |
| 0 | 0 | 0 | 0 | 6  | 1 | 3  | 1  |
| 0 | 0 | 0 | 0 | 7  | 1 | 4  | 3  |
| 0 | 0 | 0 | 0 | 8  | 1 | 3  | 3  |
| 0 | 0 | 0 | 0 | 14 | 2 | 5  | 5  |
| 0 | 0 | 0 | 0 | 3  | 1 | 3  | 0  |
| 3 | 1 | 1 | 1 | 23 | 3 | 9  | 8  |
| 0 | 0 | 0 | 0 | 16 | 2 | 7  | 6  |
| 0 | 0 | 0 | 0 | 27 | 3 | 10 | 9  |
| 0 | 0 | 0 | 0 | 18 | 2 | 6  | 6  |
| 0 | 0 | 0 | 0 | 14 | 2 | 6  | 4  |
| 0 | 0 | 0 | 0 | 13 | 2 | 5  | 5  |
| 0 | 0 | 0 | 0 | 22 | 3 | 8  | 7  |
| 3 | 1 | 1 | 1 | 23 | 3 | 8  | 8  |
| 3 | 1 | 1 | 1 | 27 | 3 | 11 | 9  |
| 0 | 0 | 0 | 0 | 18 | 2 | 6  | 6  |

|   |   |   |   |    |   |    |    |
|---|---|---|---|----|---|----|----|
| 0 | 0 | 0 | 0 | 25 | 3 | 9  | 8  |
| 0 | 0 | 0 | 0 | 12 | 2 | 6  | 3  |
| 0 | 0 | 0 | 0 | 13 | 2 | 7  | 4  |
| 0 | 0 | 0 | 0 | 19 | 2 | 7  | 6  |
| 0 | 0 | 0 | 0 | 3  | 1 | 1  | 1  |
| 0 | 0 | 0 | 0 | 16 | 2 | 6  | 6  |
| 0 | 0 | 0 | 0 | 20 | 3 | 7  | 7  |
| 0 | 0 | 0 | 0 | 3  | 1 | 1  | 1  |
| 0 | 0 | 0 | 0 | 8  | 1 | 4  | 2  |
| 0 | 0 | 0 | 0 | 8  | 1 | 3  | 3  |
| 3 | 1 | 1 | 1 | 15 | 2 | 5  | 5  |
| 0 | 0 | 0 | 0 | 16 | 2 | 6  | 6  |
| 0 | 0 | 0 | 0 | 0  | 1 | 0  | 0  |
| 0 | 0 | 0 | 0 | 10 | 2 | 4  | 4  |
| 0 | 0 | 0 | 0 | 11 | 2 | 5  | 3  |
| 0 | 0 | 0 | 0 | 15 | 2 | 6  | 6  |
| 0 | 0 | 0 | 0 | 10 | 2 | 4  | 4  |
| 0 | 0 | 0 | 0 | 16 | 2 | 7  | 7  |
| 3 | 1 | 1 | 1 | 18 | 2 | 8  | 5  |
| 0 | 0 | 0 | 0 | 0  | 1 | 0  | 0  |
| 3 | 1 | 1 | 1 | 41 | 4 | 14 | 14 |
| 3 | 1 | 1 | 1 | 14 | 2 | 5  | 5  |
| 0 | 0 | 0 | 0 | 19 | 2 | 7  | 5  |
| 0 | 0 | 0 | 0 | 2  | 1 | 1  | 1  |
| 0 | 0 | 0 | 0 | 32 | 4 | 11 | 12 |
| 0 | 0 | 0 | 0 | 6  | 1 | 2  | 2  |
| 0 | 0 | 0 | 0 | 15 | 2 | 6  | 6  |
| 0 | 0 | 0 | 0 | 30 | 4 | 11 | 10 |
| 0 | 0 | 0 | 0 | 0  | 1 | 0  | 0  |
| 0 | 0 | 0 | 0 | 7  | 1 | 5  | 2  |
| 0 | 0 | 0 | 0 | 21 | 3 | 8  | 6  |
| 3 | 1 | 1 | 1 | 24 | 3 | 8  | 8  |
| 0 | 0 | 0 | 0 | 3  | 1 | 1  | 1  |
| 0 | 0 | 0 | 0 | 10 | 2 | 5  | 2  |



total  
borthers  
ome  
scores

1  
6  
5  
2  
7  
0  
2  
7  
3  
0  
0  
0  
2  
4  
2  
0  
0  
5  
1  
0  
6  
2  
3  
20  
1  
5  
4  
3  
4  
3  
5  
4  
4  
0  
4  
4  
4  
1  
8  
2  
0  
1  
0  
1  
5  
2  
3  
5  
2  
9

0  
1  
2  
1  
3  
7  
1  
0  
2  
5  
2  
6  
14  
2  
4  
1  
0  
3  
8  
3  
10  
2  
2  
2  
5  
1  
4  
0  
1  
6  
2  
4  
2  
2  
0  
2  
4  
0  
6  
3  
8  
6  
4  
3  
6  
7  
7  
6

8  
3  
2  
6  
1  
4  
6  
1  
2  
2  
5  
4  
0  
2  
3  
3  
2  
2  
5  
0  
14  
4  
7  
0  
9  
2  
3  
9  
0  
0  
7  
8  
1  
3
